# Supplementary material for: Magnetic anisotropy and slow magnetic relaxation processes of cobalt(ii)-pseudohalide complexes
Source: Royal Society of Chemistry journal article supplement (doi:10.1039/c9dt00644c), 2019-01-01
Supplement: c9dt00644c1.pdf [file c9dt00644c1.pdf]

## **Magnetic anisotropy and slow magnetic relaxation processes of cobalt(II)-pseudohalide complexes**

Hui-Hui Cui,<sup>a</sup> Yi-Quan Zhang,<sup>\*b</sup> Xue-Tai Chen,<sup>\*a</sup> Zhenxing Wang,<sup>\*c</sup> and Zi-Ling Xue<sup>d</sup>

*<sup>a</sup>State Key Laboratory of Coordination Chemistry, School of Chemistry and Chemical Engineering, Nanjing University, Nanjing 210023, China*

*<sup>b</sup>Jiangsu Key Laboratory for NSLSCS, School of Physical Science and Technology, Nanjing Normal University, Nanjing 210023, China*

*<sup>c</sup>Wuhan National High Magnetic Field Center, Huazhong University of Science and Technology, Wuhan 430074, China*

*<sup>d</sup>Department of Chemistry, University of Tennessee, Knoxville, Tennessee 37996, USA.*

***Electronic Supplementary Information***

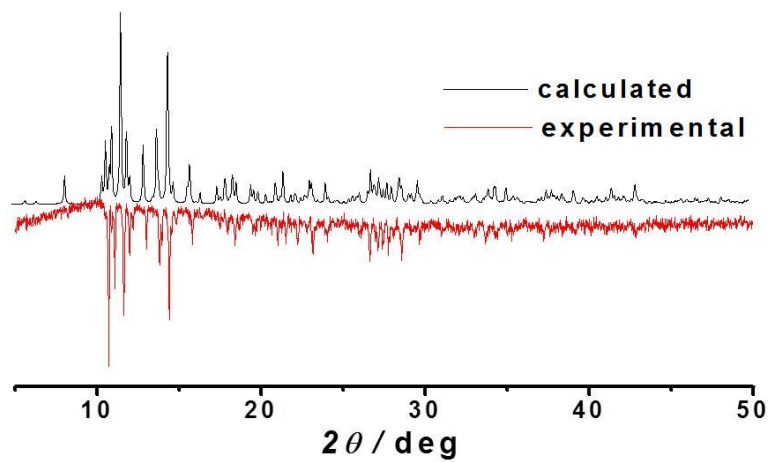

**Fig. S1** XRD patterns for complex 1.

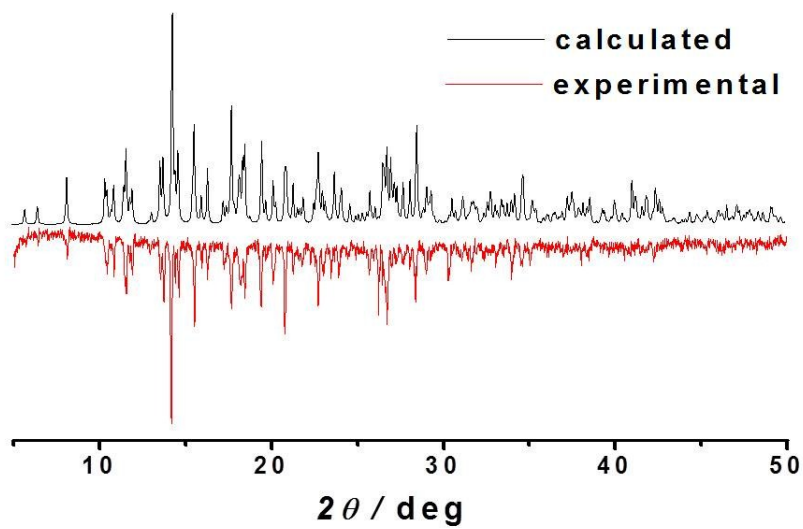

**Fig. S2** XRD patterns for complex 2.

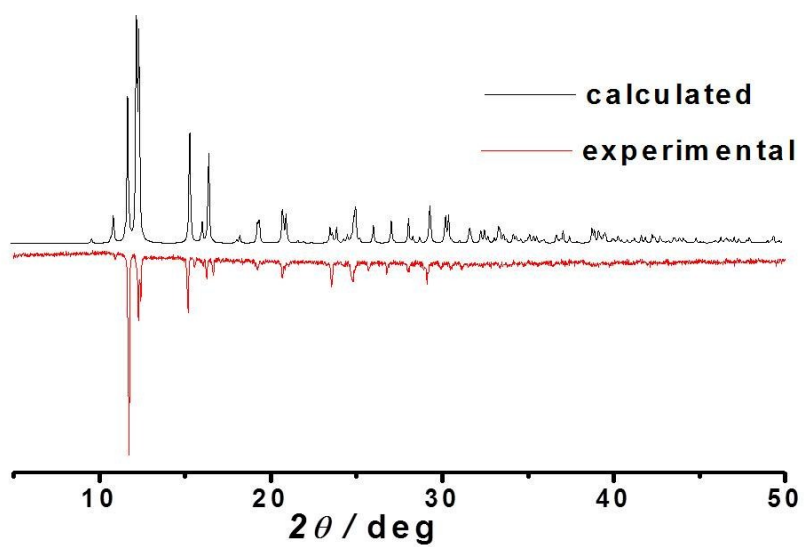

**Fig. S3** XRD patterns for complex 3.

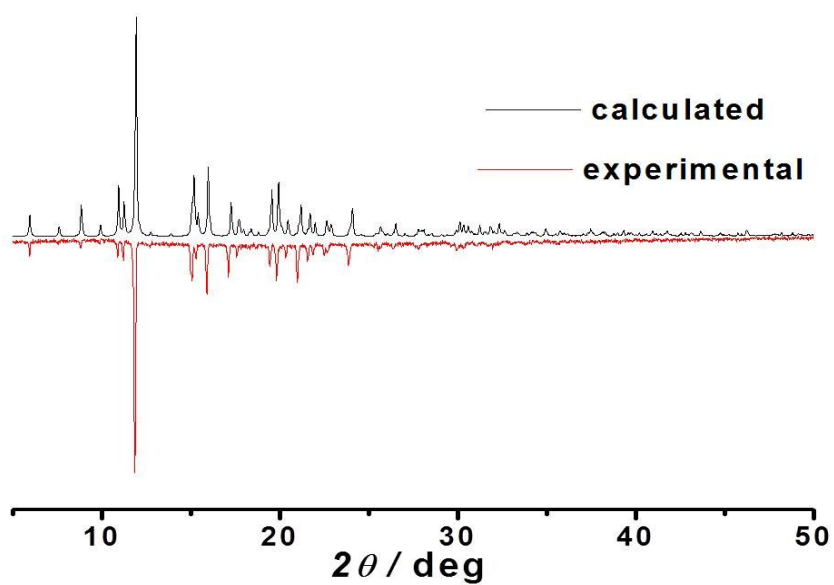

**Fig. S4** XRD patterns for complex 4.

**Table S1** Summary of crystal data and refinement for **1-4**.

|                                                                                                   | <b>1</b>                                                                        | <b>2</b>                                                                        | <b>3</b>                                          | <b>4</b>                                            |
|---------------------------------------------------------------------------------------------------|---------------------------------------------------------------------------------|---------------------------------------------------------------------------------|---------------------------------------------------|-----------------------------------------------------|
| Molecular formula                                                                                 | C <sub>29</sub> H <sub>60</sub> Co <sub>2</sub> N <sub>12</sub> OS <sub>4</sub> | C <sub>30</sub> H <sub>59</sub> Co <sub>2</sub> N <sub>13</sub> Se <sub>4</sub> | C <sub>16</sub> H <sub>28</sub> CoN <sub>10</sub> | C <sub>37</sub> H <sub>48</sub> BCoN <sub>5</sub> O |
| CCDC No.                                                                                          | 1877107                                                                         | 1877108                                                                         | 1877109                                           | 1877110                                             |
| Formula weight                                                                                    | 838.99                                                                          | 1035.60                                                                         | 419.41                                            | 648.54                                              |
| Temperature                                                                                       | 155(2) K                                                                        | 155(2) K                                                                        | 155(2) K                                          | 155(2) K                                            |
| Crystal system                                                                                    | Monoclinic                                                                      | Monoclinic                                                                      | Monoclinic                                        | Monoclinic                                          |
| Space group                                                                                       | <i>P</i> 2 <sub>1</sub> / <i>n</i>                                              | <i>P</i> 2 <sub>1</sub> / <i>n</i>                                              | <i>P</i> 2 <sub>1</sub> / <i>n</i>                | <i>P</i> 2 <sub>1</sub> / <i>c</i>                  |
| <i>a</i> /Å                                                                                       | 8.6349(9)                                                                       | 8.8160(6)                                                                       | 11.4759(19)                                       | 15.0413(7)                                          |
| <i>b</i> /Å                                                                                       | 30.343(3)                                                                       | 30.768(2)                                                                       | 14.976(3)                                         | 9.6313(4)                                           |
| <i>c</i> /Å                                                                                       | 15.6470(13)                                                                     | 15.7142(11)                                                                     | 11.4761(19)                                       | 23.5659(10)                                         |
| $\alpha$ (°)                                                                                      | 90                                                                              | 90                                                                              | 90                                                | 90                                                  |
| $\beta$ (°)                                                                                       | 104.369(3)                                                                      | 104.702(2)                                                                      | 90.840(2)                                         | 99.5000(10)                                         |
| $\gamma$ (°)                                                                                      | 90                                                                              | 90                                                                              | 90                                                | 90                                                  |
| <i>V</i> /Å <sup>3</sup>                                                                          | 3978.2(7)                                                                       | 4122.9(5)                                                                       | 1972.1(6)                                         | 3367.1(3)                                           |
| <i>Z</i>                                                                                          | 4                                                                               | 4                                                                               | 4                                                 | 4                                                   |
| <i>D</i> <sub>calc</sub> , g/cm <sup>3</sup>                                                      | 1.401                                                                           | 1.668                                                                           | 1.413                                             | 1.279                                               |
| $\mu$ / mm <sup>-1</sup>                                                                          | 1.085                                                                           | 4.375                                                                           | 0.894                                             | 0.547                                               |
| <i>F</i> (000)                                                                                    | 1776                                                                            | 2080                                                                            | 884                                               | 1380                                                |
| $\theta$ range [°]                                                                                | 1.342/25.998                                                                    | 2.396/25.018                                                                    | 2.236/25.996                                      | 2.289/25.994                                        |
| Reflns collected                                                                                  | 31449                                                                           | 29345                                                                           | 15710                                             | 26122                                               |
| <i>R</i> <sub>int</sub>                                                                           | 0.0596                                                                          | 0.0509                                                                          | 0.0448                                            | 0.0377                                              |
| Indep. reflns                                                                                     | 7785                                                                            | 7272                                                                            | 3876                                              | 6576                                                |
| Refns obs.                                                                                        | 6813                                                                            | 6283                                                                            | 3396                                              | 5460                                                |
| [ <i>I</i> > 2 $\sigma$ ( <i>I</i> )]                                                             |                                                                                 |                                                                                 |                                                   |                                                     |
| Data/restr./paras                                                                                 | 7785/3/450                                                                      | 7272/0/451                                                                      | 3876/0/248                                        | 6576/372/463                                        |
| Goodness-of-fit on <i>F</i> <sup>2</sup>                                                          | 1.141                                                                           | 1.052                                                                           | 1.060                                             | 1.043                                               |
| <i>R</i> <sub>1</sub> , <i>wR</i> <sub>2</sub> [ <i>I</i> > 2 $\sigma$ ( <i>I</i> )] <sup>a</sup> | 0.0437/0.1186                                                                   | 0.0305/0.0721                                                                   | 0.0295/0.0751                                     | 0.0360/0.0803                                       |
| <i>R</i> <sub>1</sub> , <i>wR</i> <sub>2</sub> [all data] <sup>a</sup>                            | 0.0534/0.1374                                                                   | 0.0384/0.0749                                                                   | 0.0362/0.0779                                     | 0.0484/0.0846                                       |

**Table S2** Selected Bond Lengths (Å) and Angles (deg) for complexes **1-4**.

| <b>1a</b>  |           | <b>1b</b>   |            |
|------------|-----------|-------------|------------|
| Co1-N1     | 2.190(3)  | Co2-N7      | 2.304(3)   |
| Co1-N2     | 2.294(3)  | Co2-N8      | 2.180(3)   |
| Co1-N3     | 2.193(2)  | Co2-N9      | 2.316(2)   |
| Co1-N4     | 2.264(3)  | Co2-N10     | 2.180(3)   |
| Co1-N5     | 2.065(3)  | Co2-N11     | 2.073(3)   |
| Co1-N6     | 2.080(3)  | Co2-N12     | 2.072(3)   |
| N1-Co1-N3  | 146.78(9) | N8-Co2-N10  | 146.76(10) |
| N2-Co1-N4  | 101.60(9) | N7-Co2-N9   | 100.99(9)  |
| N5-Co1-N6  | 84.28(11) | N11-Co2-N12 | 86.33(12)  |
| N2-Co1-N5  | 86.09(10) | N7-Co2-N11  | 86.19(10)  |
| N4-Co1-N6  | 89.30(10) | N9-Co2-N12  | 86.82(11)  |
| C13-N5-Co1 | 155.5(3)  | C27-N11-Co2 | 173.4(3)   |
| C14-N6-Co1 | 149.3(3)  | C28-N12-Co2 | 173.4(3)   |

  

| <b>2a</b>  |            | <b>2b</b>   |            |
|------------|------------|-------------|------------|
| Co1-N1     | 2.195(3)   | Co2-N5      | 2.304(2)   |
| Co1-N2     | 2.252(3)   | Co2-N6      | 2.174(3)   |
| Co1-N3     | 2.192(3)   | Co2-N7      | 2.307(3)   |
| Co1-N4     | 2.276(3)   | Co2-N8      | 2.161(3)   |
| Co1-N9     | 2.073(3)   | Co2-N11     | 2.081(3)   |
| Co1-N10    | 2.080(3)   | Co2-N12     | 2.083(3)   |
| N1-Co1-N3  | 147.80(10) | N6-Co2-N8   | 147.67(10) |
| N2-Co1-N4  | 101.90(10) | N5-Co2-N7   | 101.54(9)  |
| N9-Co1-N10 | 83.85(11)  | N11-Co2-N12 | 85.88(11)  |

|             |           |             |           |
|-------------|-----------|-------------|-----------|
| N2-Co1-N10  | 89.14(10) | N5-Co2-N12  | 86.85(10) |
| N4-Co1-N9   | 86.42(10) | N7-Co2-N11  | 85.83(10) |
| C25-N9-Co1  | 153.2(3)  | C27-N11-Co2 | 175.1(3)  |
| C26-N10-Co1 | 155.4(3)  | C28-N12-Co2 | 175.3(3)  |

---

| <b>3</b>   |            | <b>4</b>  |            |
|------------|------------|-----------|------------|
| Co1-N1     | 2.2731(13) | Co1-N1    | 2.108(3)   |
| Co1-N2     | 2.1762(14) | Co1-N2    | 2.161(4)   |
| Co1-N3     | 2.2826(13) | Co1-N3    | 2.169(7)   |
| Co1-N4     | 2.1791(14) | Co1-N4    | 2.205(3)   |
| Co1-N5     | 2.1058(14) | Co1-N5    | 1.9399(17) |
| Co1-N8     | 2.0756(15) | N1-Co1-N2 | 82.33(10)  |
| N2-Co1-N4  | 147.78(5)  | N1-Co1-N4 | 82.68(10)  |
| N1-Co1-N3  | 102.29(5)  | N2-Co1-N3 | 82.48(14)  |
| N5-Co1-N8  | 83.38(6)   | N1-Co1-N3 | 136.0(2)   |
| N1-Co1-N5  | 86.75(5)   | N2-Co1-N4 | 136.71(13) |
| N3-Co1-N8  | 88.03(5)   | N3-Co1-N4 | 80.88(14)  |
| C13-N5-Co1 | 163.20(15) | N1-Co1-N5 | 117.12(10) |
| C15-N8-Co1 | 160.01(14) | N2-Co1-N5 | 106.84(11) |
| C14-N6-C13 | 123.64(17) | N3-Co1-N5 | 106.70(2)  |
| C16-N9-C15 | 119.12(15) | N4-Co1-N5 | 116.16(10) |

**Table S3** The results of the continuous shape measures (*CShMs*) analyses of **1**, **2**, **3** and **4** by SHAPE software<sup>S1</sup>

| <i>CShM</i> |                    | <b>1a</b> | <b>1b</b> | <b>2a</b> | <b>2b</b> | <b>3</b> |
|-------------|--------------------|-----------|-----------|-----------|-----------|----------|
| Six-vertex  | Hexagon            | 33.971    | 33.631    | 33.757    | 33.517    | 33.729   |
|             | Pentagonal pyramid | 19.098    | 19.191    | 19.173    | 19.166    | 18.840   |

|  |                            |        |        |        |        |        |
|--|----------------------------|--------|--------|--------|--------|--------|
|  | Octahedron                 | 3.277  | 2.760  | 3.230  | 2.659  | 2.967  |
|  | Trigonal prism             | 6.603  | 8.094  | 6.578  | 8.566  | 7.589  |
|  | Johnson pentagonal pyramid | 22.939 | 22.985 | 22.998 | 22.914 | 22.627 |

| <i>CShM</i> |                            | <b>4</b> |
|-------------|----------------------------|----------|
| Five-vertex | Pentagon                   | 31.087   |
|             | Vacant octahedron          | 3.468    |
|             | Trigonal bipyramid         | 5.661    |
|             | Spherical square pyramid   | 0.442    |
|             | Johnson trigonal bipyramid | 8.642    |

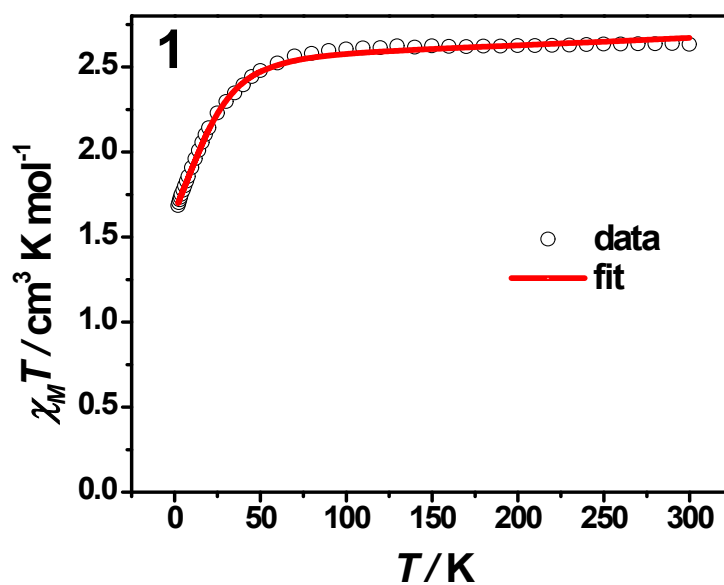

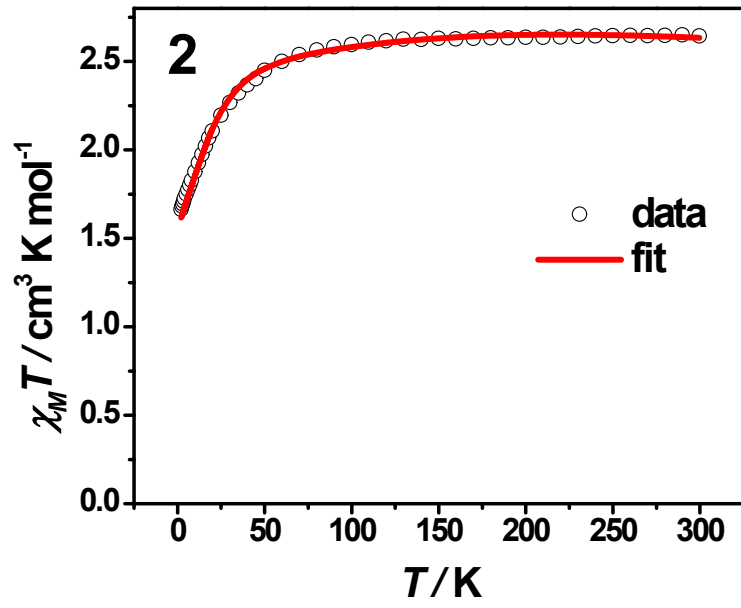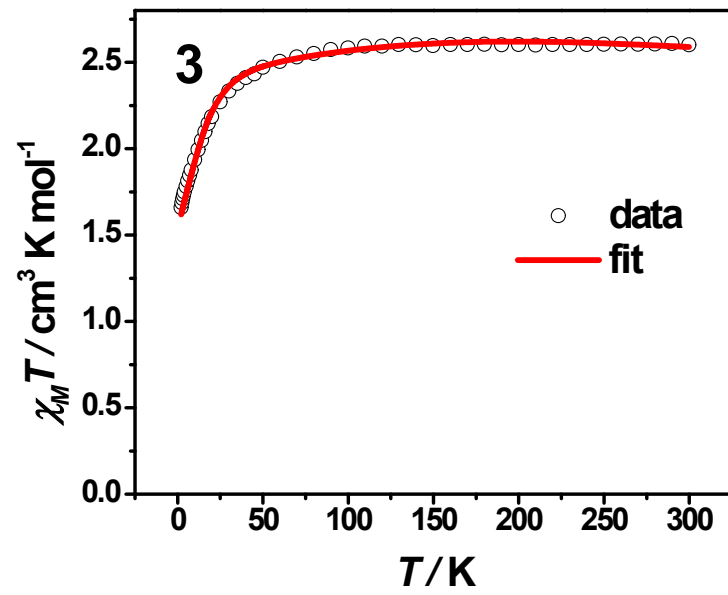



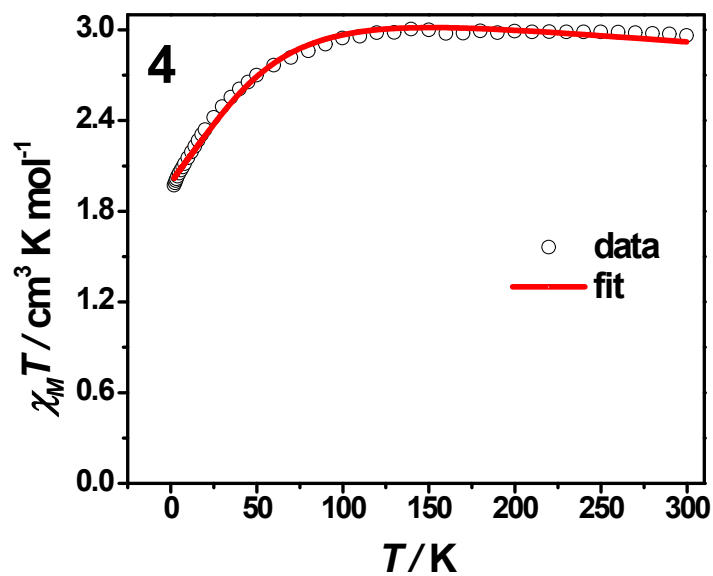

**Fig. S5** Variable-temperature dc susceptibility data under 0.1 T applied dc field of **1**, **2**, **3** and **4**. Solid lines are the fits to the data using the full Hamiltonian as shown eqn (1) with the program *PHIS<sup>2</sup>*.

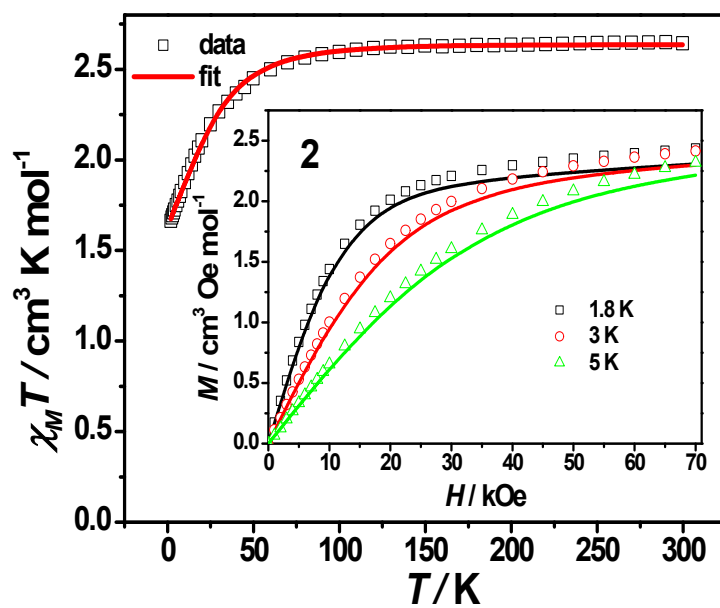

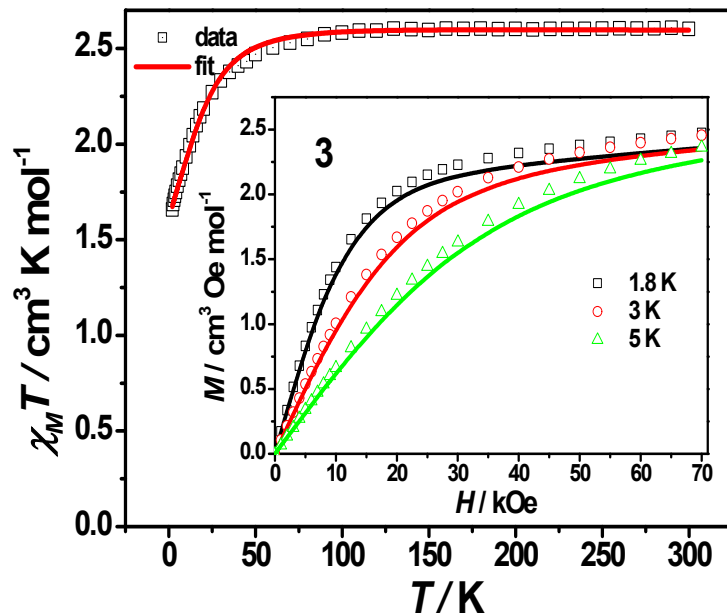

**Fig. S6** Variable-temperature dc susceptibility data under 0.1 T applied dc field of 2 and 3. Inset: field dependence of the magnetization below 5 K. Solid lines are the fits to the magnetic data using the spin Hamiltonian as shown in eqn (2) with the program *PHI*<sup>S2</sup>.

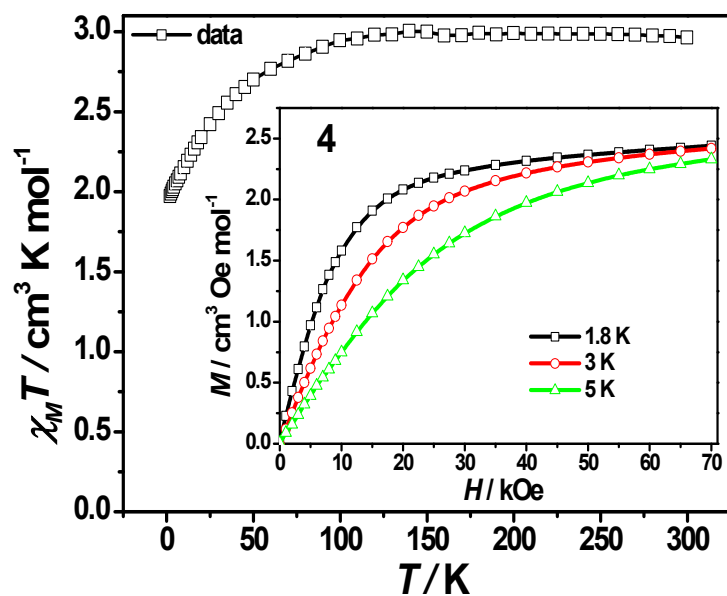

**Fig. S7** Variable-temperature dc susceptibility data under 0.1 T applied dc field of 4. Inset: field dependence of the magnetization below 5 K. The solid lines are for eye guide.

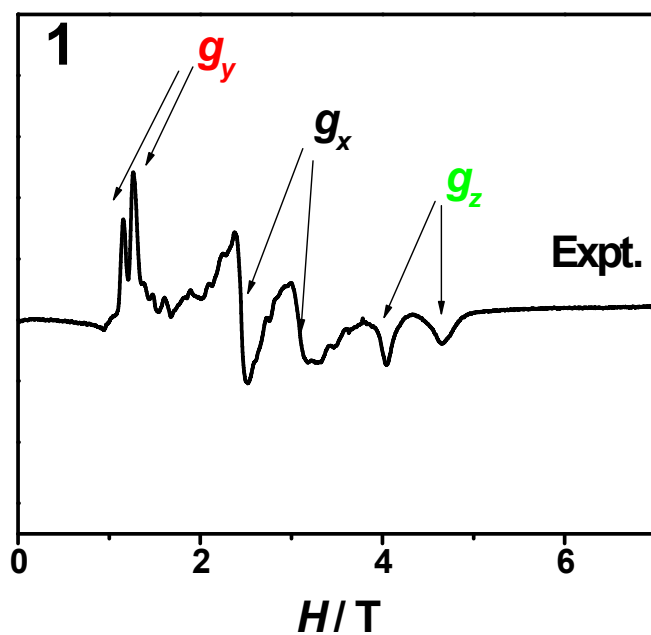

**Fig. S8** The experimental spectra for complex **1** with  $g_y = 6.37$  and  $5.76$ ,  $g_x = 2.93$  and  $2.34$ ,  $g_z = 1.79$  and  $1.55$  under 106 GHz in derivative mode at 4.2 K.

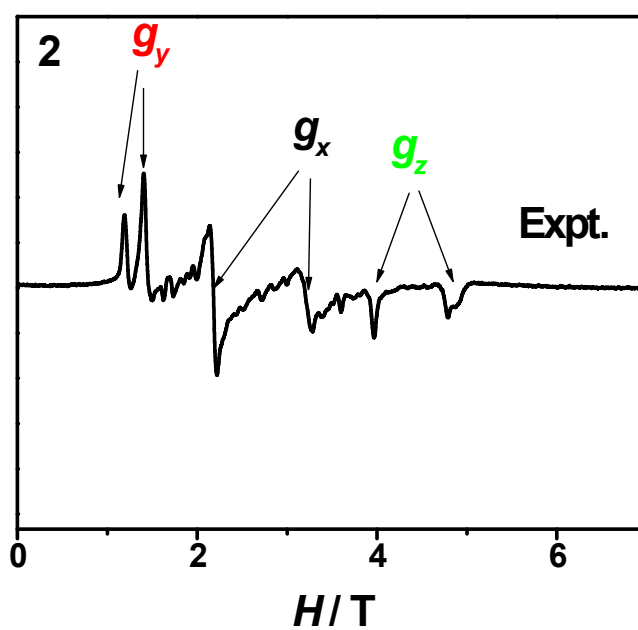

**Fig. S9** The experimental spectra for complex **2** with  $g_y = 6.42$  and  $5.41$ ,  $g_x = 3.46$  and  $2.37$ ,  $g_z = 1.91$  and  $1.57$  under 112 GHz in derivative mode at 4.2 K.

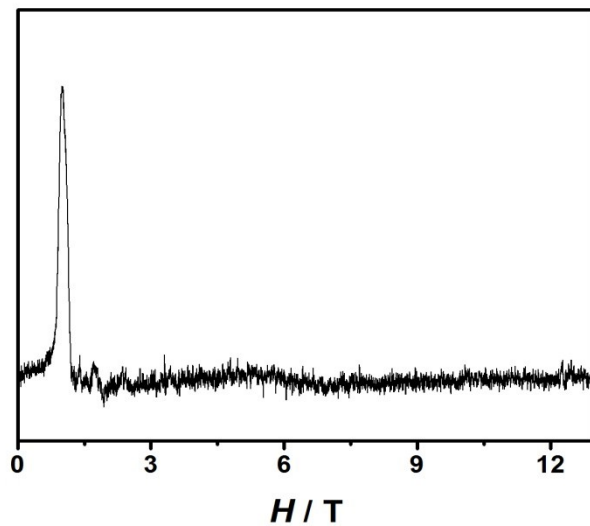

**Fig. S10** The HEFER spectrum for complex **4** under 112 GHz at 4.2 K.

## Computational details

Both of complexes **1** and **2** have two types of structures **1a** and **1b** for **1**, and **2a** and **2b** for **2**. Complete active space second-order multiconfigurational perturbation theory (CASPT2) considering the effect of the dynamic electron correlation based on complete-active-space self-consistent field (CASSCF) method with MOLCAS 8.2 program package<sup>S4</sup> was performed on (see Fig. S11 for the calculated complete structure of **1a**; see Fig. S14 for the other complete structures) the basis of single-crystal X-ray determined geometries of **1–4**. For the first CASSCF calculation, the basis sets for all atoms are atomic natural orbitals from the MOLCAS ANO-RCC library: ANO-RCC-VTZP for magnetic center ion Co<sup>II</sup>; VTZ for close N atoms; VDZ for distant atoms. The calculations employed the second order Douglas-Kroll-Hess Hamiltonian, where scalar relativistic contractions were taken into account in the basis set. The effect of the dynamical electronic correlation was applied using CASPT2 based on the first CASSCF calculation. After that, the spin-orbit coupling was handled separately in the restricted active space state interaction (RASSI-SO) procedure. For all complexes, the active electrons in 5+5' active spaces include all *d* electrons (CAS(7 in 5+5')) in the CASSCF calculations. To exclude all the doubts, we calculated all the roots in the active space. We have mixed the maximum number of spin-free state which was possible with our hardware (all from 10 quadruplets and 20 from 40 doublets). Single\_Aniso<sup>S5</sup> program was used to obtain zero-field splitting parameters *D* (*E*) (cm<sup>-1</sup>), *g* tensors, energy levels, magnetic axes, *et al.*, based on the above CASPT2/RASSI calculations.

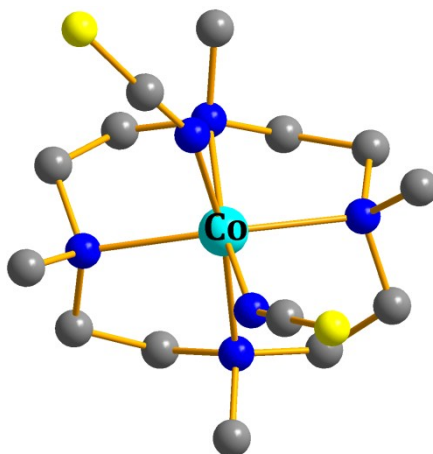

**Fig. S11** Calculated complete structure of **1a**. H atoms are omitted for clarity.

**Table S4** Calculated spin-free energies ( $\text{cm}^{-1}$ ) of the lowest ten terms ( $S = 3/2$ ) of complexes **1–4** using CASPT2/RASSI with MOLCAS 8.2.

| spin-free<br>states | <b>1a</b>          | <b>1b</b>          | <b>2a</b>          | <b>2b</b>          | <b>3</b>           | <b>4</b>           |
|---------------------|--------------------|--------------------|--------------------|--------------------|--------------------|--------------------|
|                     | $E/\text{cm}^{-1}$ | $E/\text{cm}^{-1}$ | $E/\text{cm}^{-1}$ | $E/\text{cm}^{-1}$ | $E/\text{cm}^{-1}$ | $E/\text{cm}^{-1}$ |
| 1                   | 0.0                | 0.0                | 0.0                | 0.0                | 0.0                | 0.0                |
| 2                   | 1516.0             | 1565.3             | 1440.1             | 1556.9             | 1687.2             | 375.7              |
| 3                   | 2667.9             | 2530.8             | 2502.3             | 2442.3             | 2614.7             | 1306.5             |
| 4                   | 7735.5             | 7849.3             | 7784.1             | 8041.1             | 8069.0             | 3095.4             |
| 5                   | 8481.3             | 8458.3             | 8608.4             | 8503.8             | 8577.8             | 7620.8             |
| 6                   | 9336.3             | 9232.8             | 9314.2             | 9213.5             | 9355.8             | 7973.2             |
| 7                   | 16692.2            | 16854.7            | 16838.4            | 16925.9            | 17043.9            | 10720.3            |
| 8                   | 20212.2            | 20146.9            | 20743.8            | 20772.4            | 20424.7            | 17326.4            |
| 9                   | 20704.8            | 21766.5            | 21178.1            | 21241.8            | 20850.1            | 17906.7            |
| 10                  | 21707.3            | 12250.8            | 22123.3            | 21962.8            | 21486.3            | 19138.7            |

**Table S5.** Calculated weights of the five most important spin-free states for the lowest two spin-orbit states of complexes **1–4** using CASPT2/RASSI with MOLCAS 8.2.

|           | Spin-orbit states | Energy (cm <sup>-1</sup> ) | Spin-free states, Spin, Weights |                |                |                |                |
|-----------|-------------------|----------------------------|---------------------------------|----------------|----------------|----------------|----------------|
| <b>1a</b> | 1                 | 0.0                        | 1, 1.5, 0.9260                  | 2, 1.5, 0.0615 | 3, 1.5, 0.0095 | 5, 1.5, 0.0009 | 4, 1.5, 0.0008 |
|           | 2                 | 61.3                       | 1, 1.5, 0.9756                  | 2, 1.5, 0.0113 | 3, 1.5, 0.0063 | 4, 1.5, 0.0034 | 5, 1.5, 0.0016 |
| <b>1b</b> | 1                 | 0.0                        | 1, 1.5, 0.9292                  | 2, 1.5, 0.0564 | 3, 1.5, 0.0114 | 5, 1.5, 0.0010 | 4, 1.5, 0.0007 |
|           | 2                 | 56.5                       | 1, 1.5, 0.9754                  | 2, 1.5, 0.0115 | 3, 1.5, 0.0063 | 4, 1.5, 0.0034 | 5, 1.5, 0.0016 |
| <b>2a</b> | 1                 | 0.0                        | 1, 1.5, 0.9217                  | 2, 1.5, 0.0628 | 3, 1.5, 0.0126 | 5, 1.5, 0.0010 | 4, 1.5, 0.0007 |
|           | 2                 | 62.8                       | 1, 1.5, 0.9727                  | 2, 1.5, 0.0134 | 3, 1.5, 0.0073 | 4, 1.5, 0.0034 | 5, 1.5, 0.0014 |
| <b>2b</b> | 1                 | 0.0                        | 1, 1.5, 0.9299                  | 2, 1.5, 0.0514 | 3, 1.5, 0.0158 | 5, 1.5, 0.0011 | 4, 1.5, 0.0005 |
|           | 2                 | 54.8                       | 1, 1.5, 0.9729                  | 2, 1.5, 0.0142 | 3, 1.5, 0.0065 | 4, 1.5, 0.0033 | 5, 1.5, 0.0014 |
| <b>3</b>  | 1                 | 0.0                        | 1, 1.5, 0.9382                  | 2, 1.5, 0.0478 | 3, 1.5, 0.0109 | 5, 1.5, 0.0011 | 4, 1.5, 0.0006 |
|           | 2                 | 51.4                       | 1, 1.5, 0.9769                  | 2, 1.5, 0.0105 | 3, 1.5, 0.0062 | 4, 1.5, 0.0032 | 5, 1.5, 0.0014 |
| <b>4</b>  | 1                 | 0.0                        | 1, 1.5, 0.6853                  | 2, 1.5, 0.2837 | 3, 1.5, 0.0218 | 4, 1.5, 0.0066 | 5, 1.5, 0.0005 |
|           | 2                 | 162.3                      | 1, 1.5, 0.8444                  | 2, 1.5, 0.0827 | 3, 1.5, 0.0649 | 4, 1.5, 0.0038 | 5, 1.5, 0.0011 |

**Table S6.** Calculated zero-field splitting parameters  $D(E)$  (cm<sup>-1</sup>) and  $\mathbf{g}$  ( $g_x, g_y, g_z$ ) tensors of the lowest spin-orbit state of complexes **1–3** using CASPT2/RASSI with MOLCAS 8.2.

|              | <b>1a</b>      | <b>1b</b>      | <b>2a</b>      | <b>2b</b>      |
|--------------|----------------|----------------|----------------|----------------|
| CAS          | (7, 5+5')      | (7, 5+5')      | (7, 5+5')      | (7, 5+5')      |
| Spin         | $S_{Co} = 3/2$ | $S_{Co} = 3/2$ | $S_{Co} = 3/2$ | $S_{Co} = 3/2$ |
| $D(E)$       | 26.6(8.8)      | 24.5(8.1)      | 27.4(8.9)      | 25.9(-5.2)     |
| $\mathbf{g}$ | 2.545          | 2.516          | 2.542          | 2.499          |
|              | 2.296          | 2.274          | 2.283          | 2.313          |
|              | 2.135          | 2.117          | 2.112          | 2.111          |
|              | <b>3</b>       |                |                |                |
| CAS          | (7, 5+5')      |                |                |                |
| Spin         | $S_{Co} = 3/2$ |                |                |                |
| $D(E)$       | 22.5(7.2)      |                |                |                |
| $\mathbf{g}$ | 2.484          |                |                |                |
|              | 2.271          |                |                |                |
|              | 2.116          |                |                |                |

**Table S7** Calculated energy levels ( $\text{cm}^{-1}$ ),  $\mathbf{g}$  ( $g_x, g_y, g_z$ ) tensors of the lowest two doublets ( $S = 1/2$ ) of complex **4** using CASPT2/RASSI with MOLCAS 8.2.

|   | $E/\text{cm}^{-1}$ | $\mathbf{g}$ |
|---|--------------------|--------------|
| 1 | 0.0                | 0.541        |
|   |                    | 0.735        |
|   |                    | 9.253        |
| 2 | 162.3              | 4.462        |
|   |                    | 4.008        |
|   |                    | 3.381        |



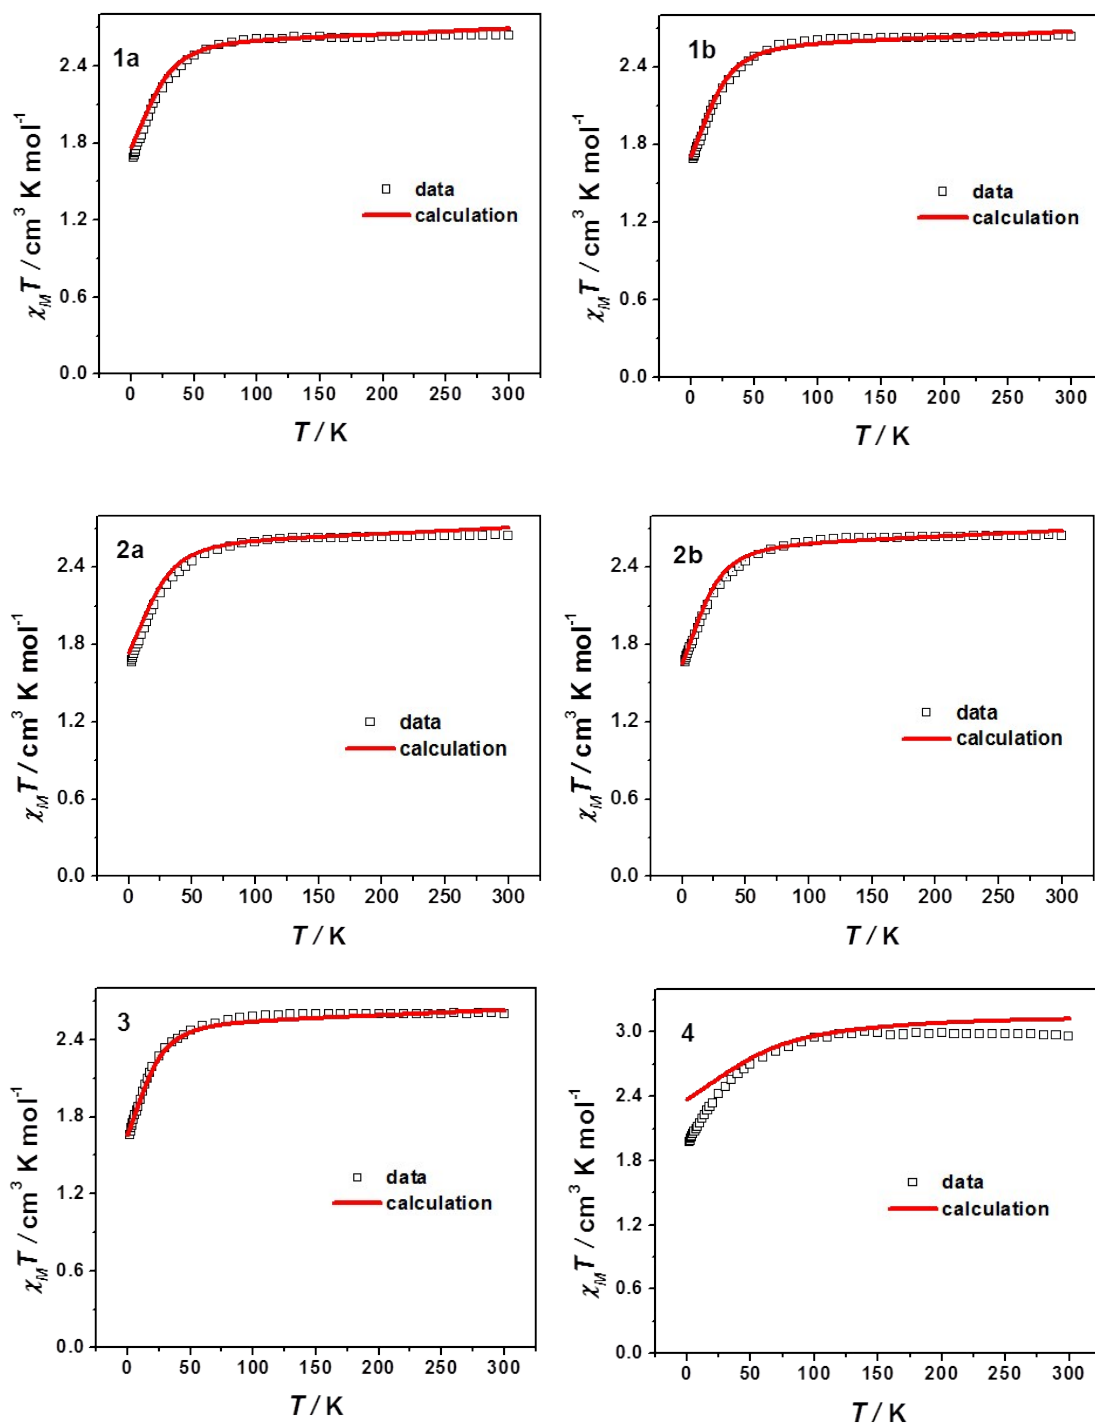

**Fig. S12** The theoretical (red solid line) curves of magnetic susceptibilities of **1a**, **1b**, **2a**, **2b**, **3** and **4** compared with the experimental data.

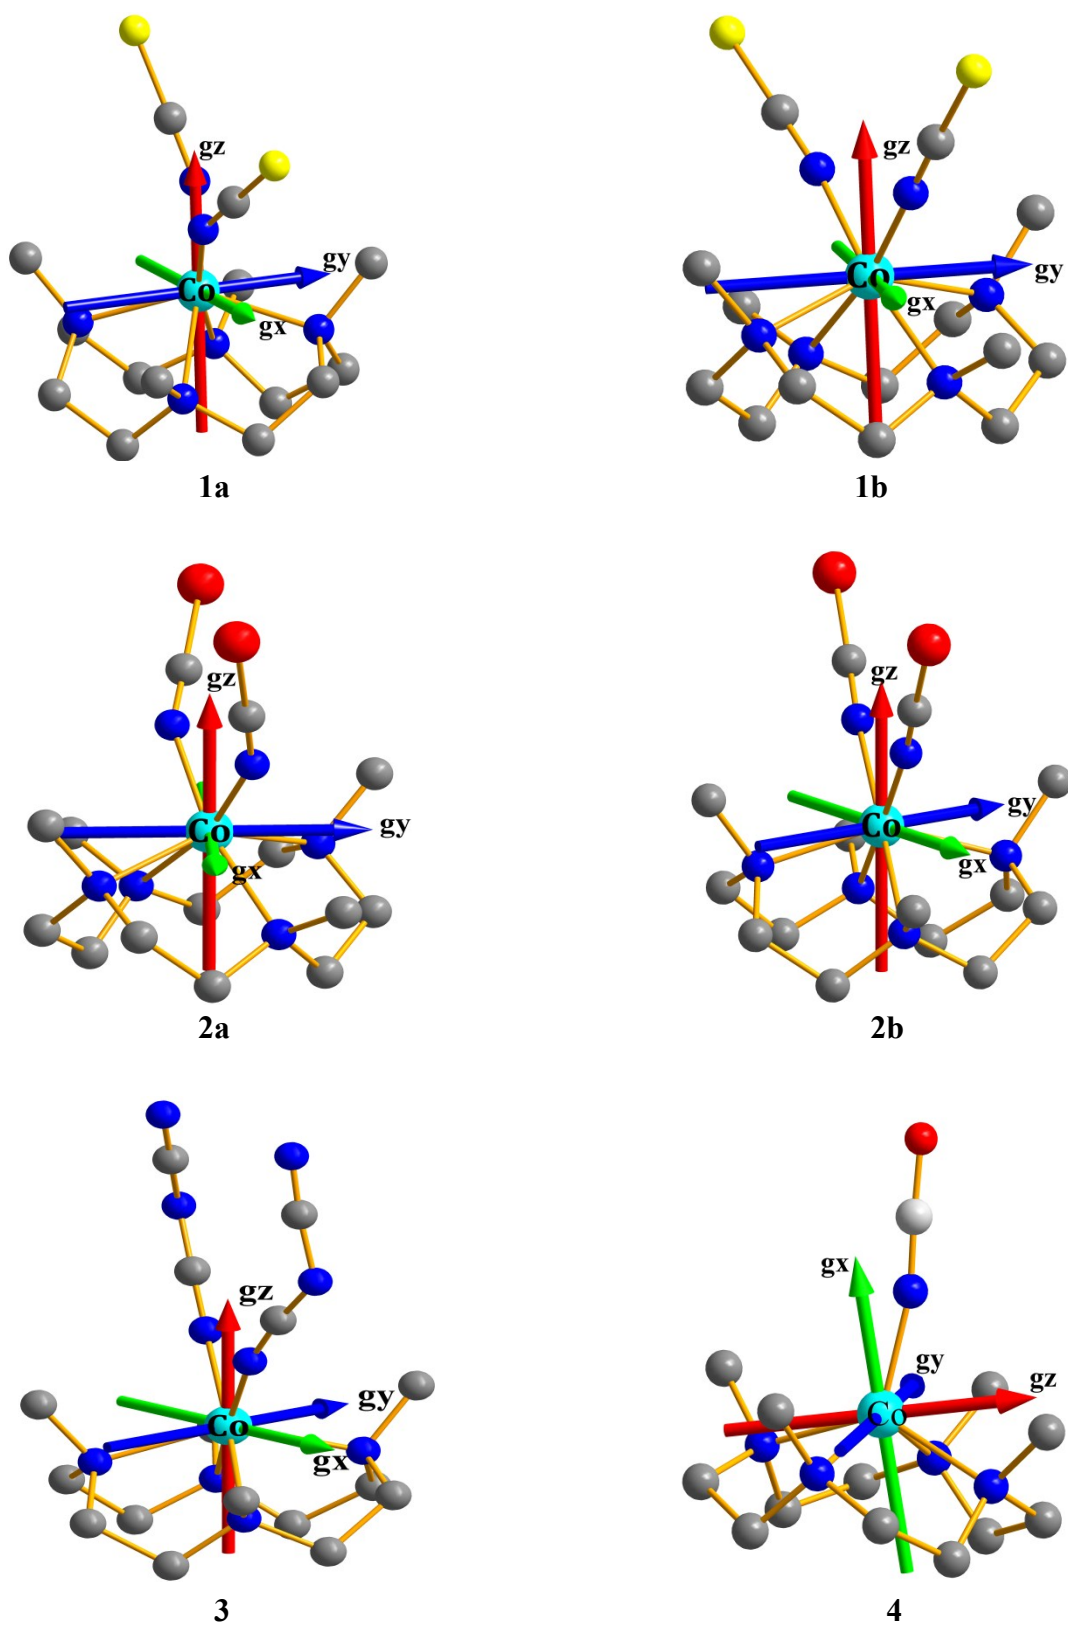

**Fig. S13** Calculated orientations of the local main magnetic axes ( $g_x$ : green;  $g_y$ : blue;  $g_z$ : red) on  $\text{Co}^{\text{II}}$  ions of **1a**, **1b**, **2a**, **2b**, **3** and **4**.

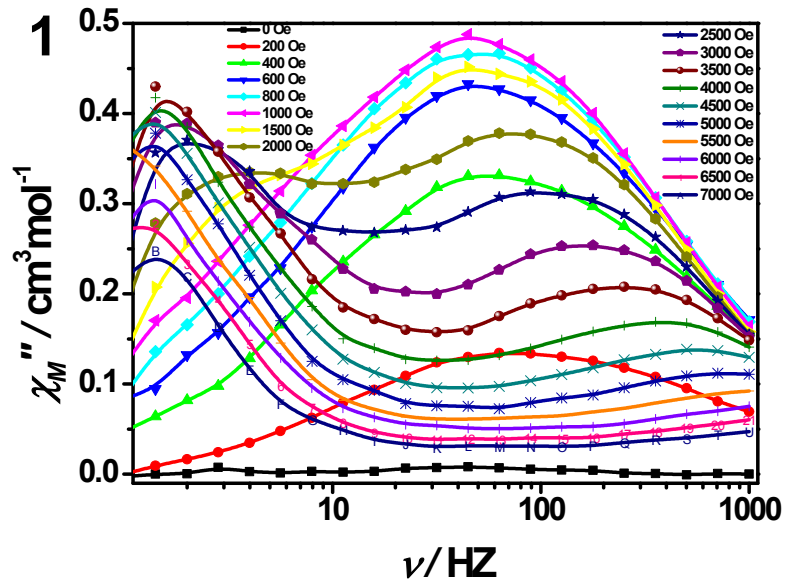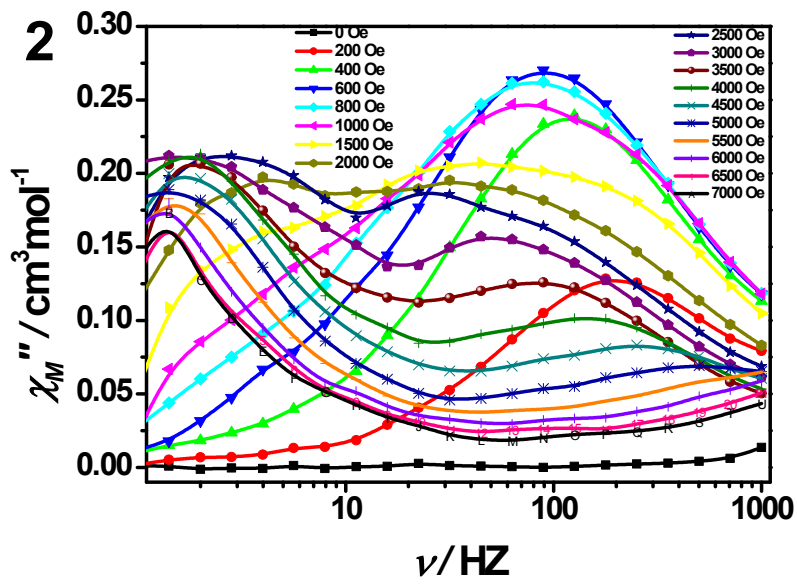

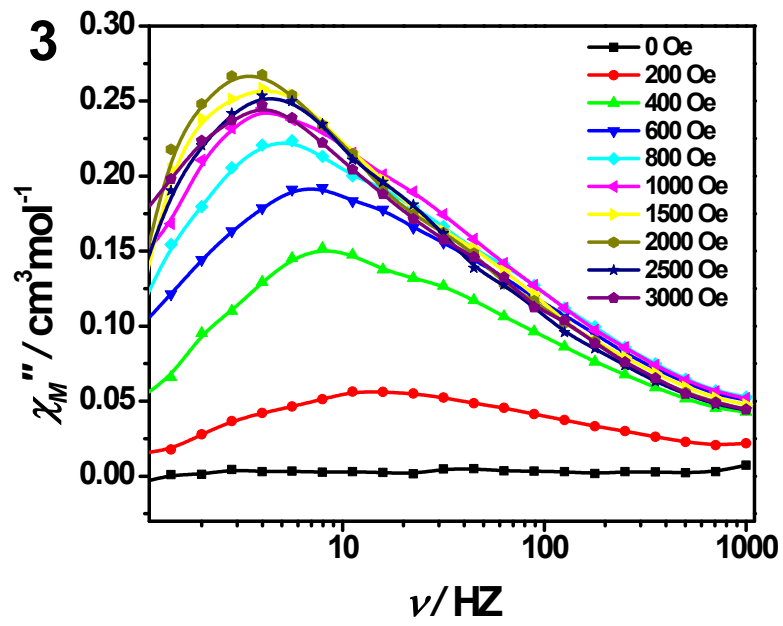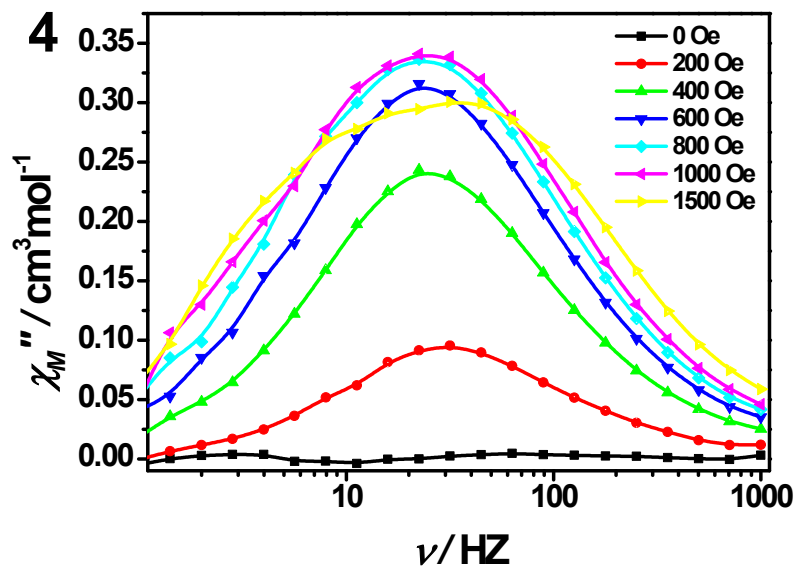

**Fig. S14** Frequency dependence of out-of-phase ( $\chi_M''$ ) ac susceptibility at 1.8 K under the different applied static fields for **1**, **2**, **3** and **4**. The solid lines are for eye guide.

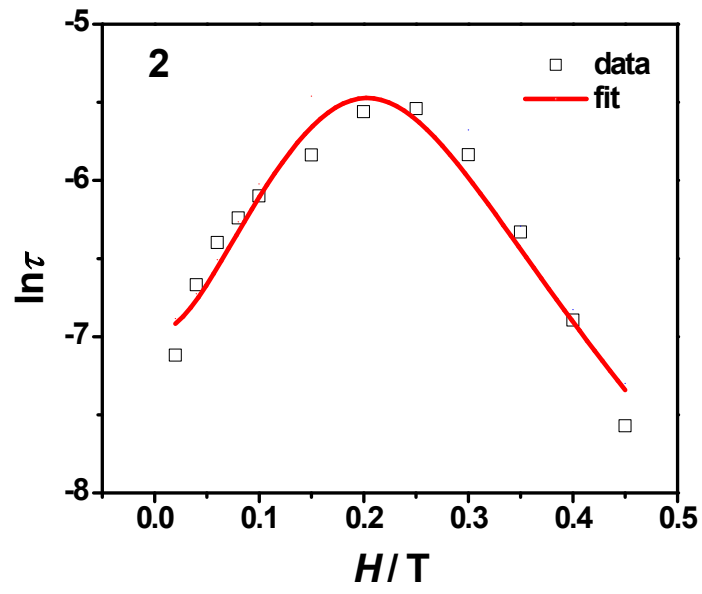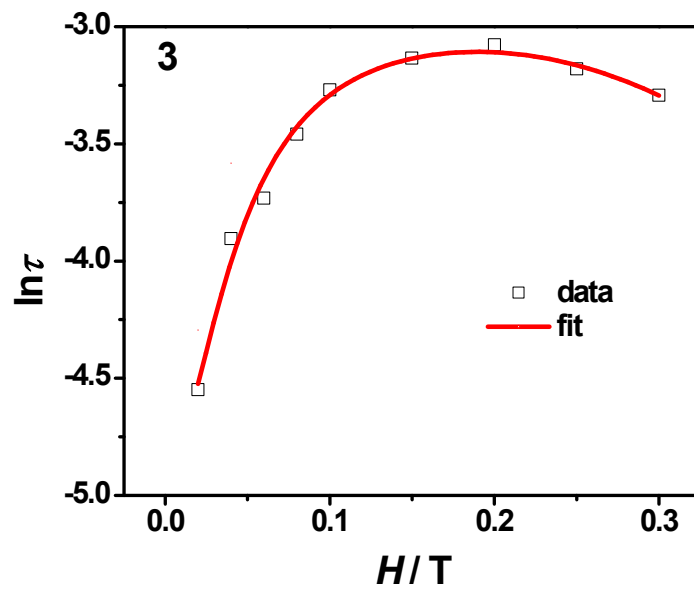

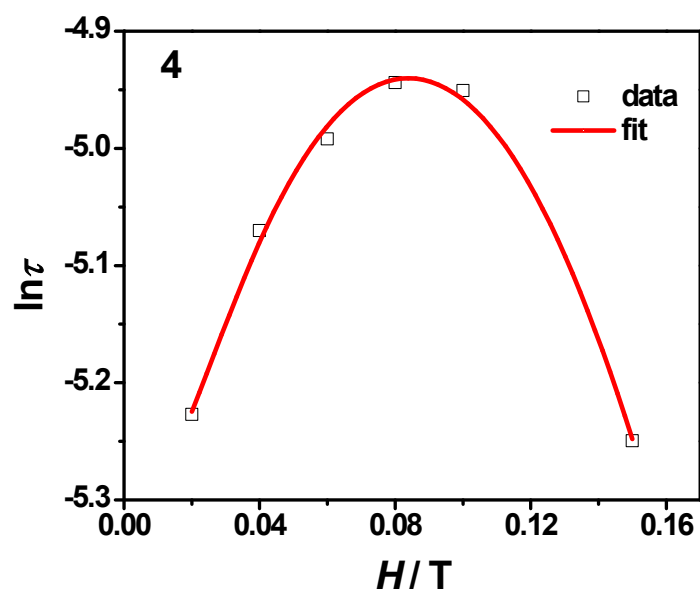

**Fig. S15** Field dependence of the magnetization relaxation times for 2, 3 and 4. The red line represents the best fit by using eqn (3).

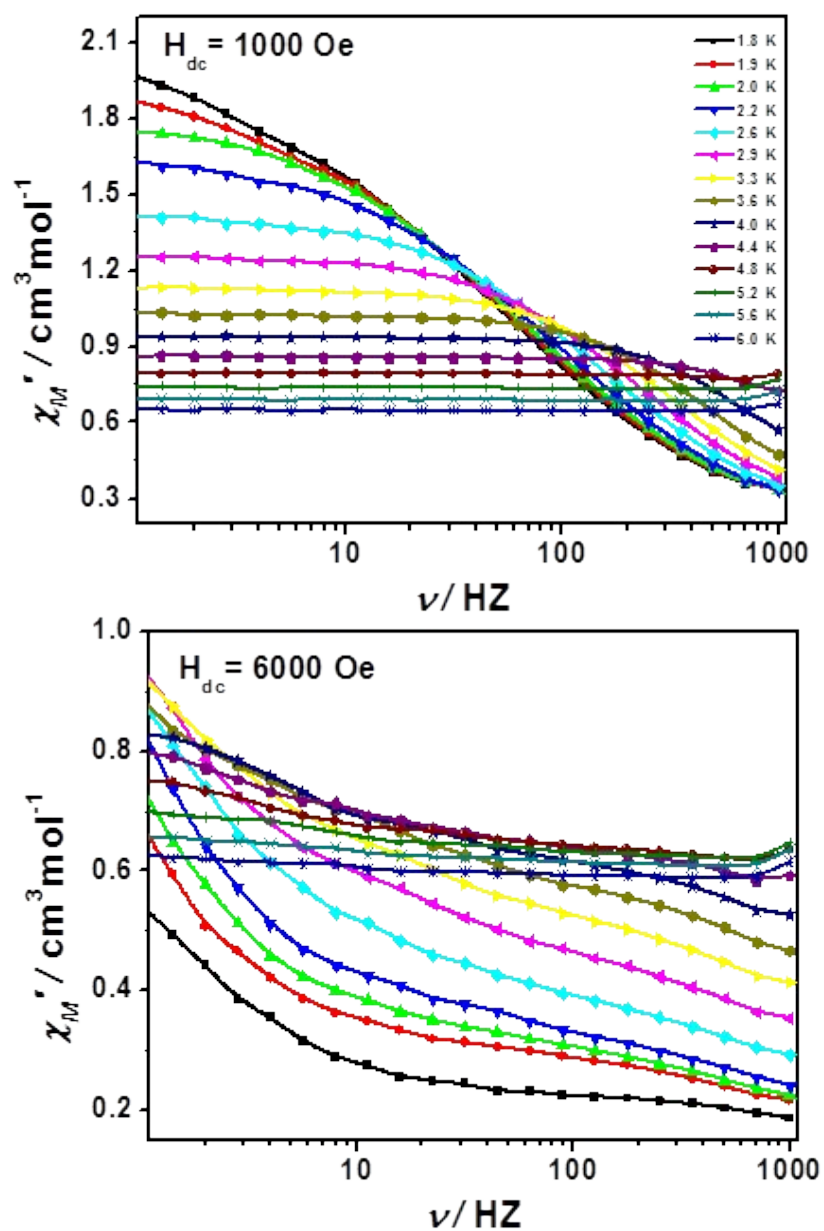

**Fig. S16** Frequency dependence of in-of-phase ( $\chi_M'$ ) ac susceptibility from 1.8 to 6 K for **1** under 0.1 T and 0.6 T, respectively. The solid lines are for eye guide.

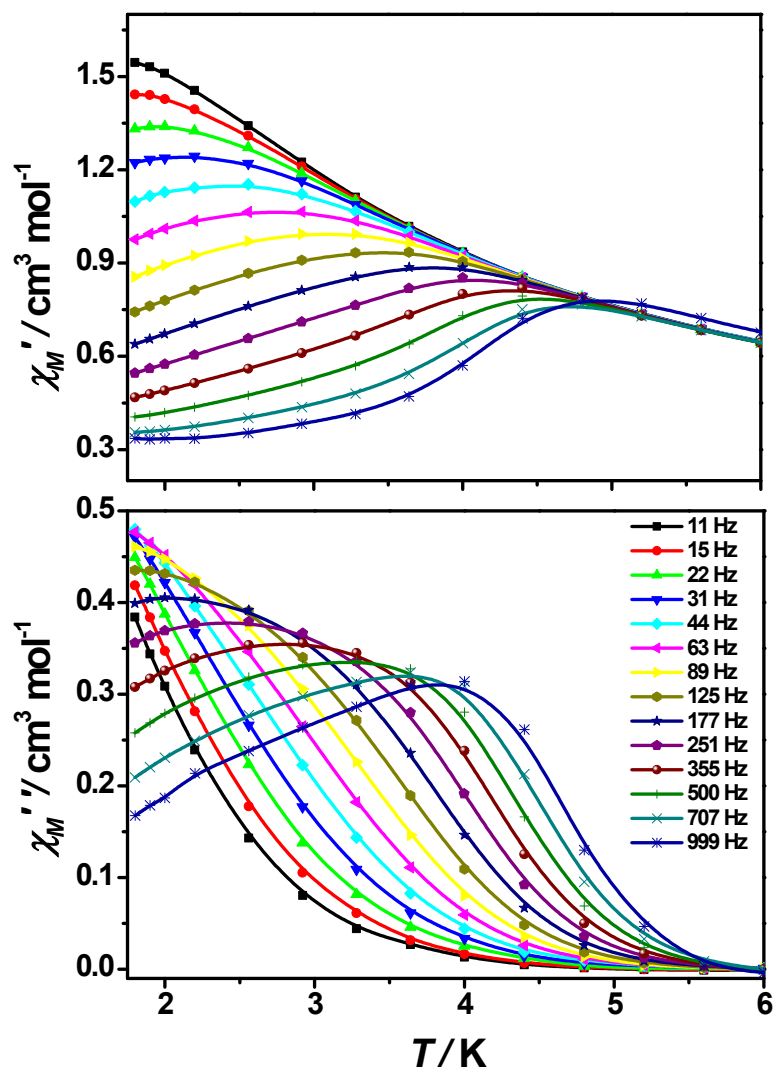

**Fig. S17** Temperature dependence of in-of-phase ( $\chi_M'$ ) and out-of-phase ac susceptibility ( $\chi_M''$ ) at different ac frequency under a 0.1 T dc field for **1**. The solid lines are for eye guide.



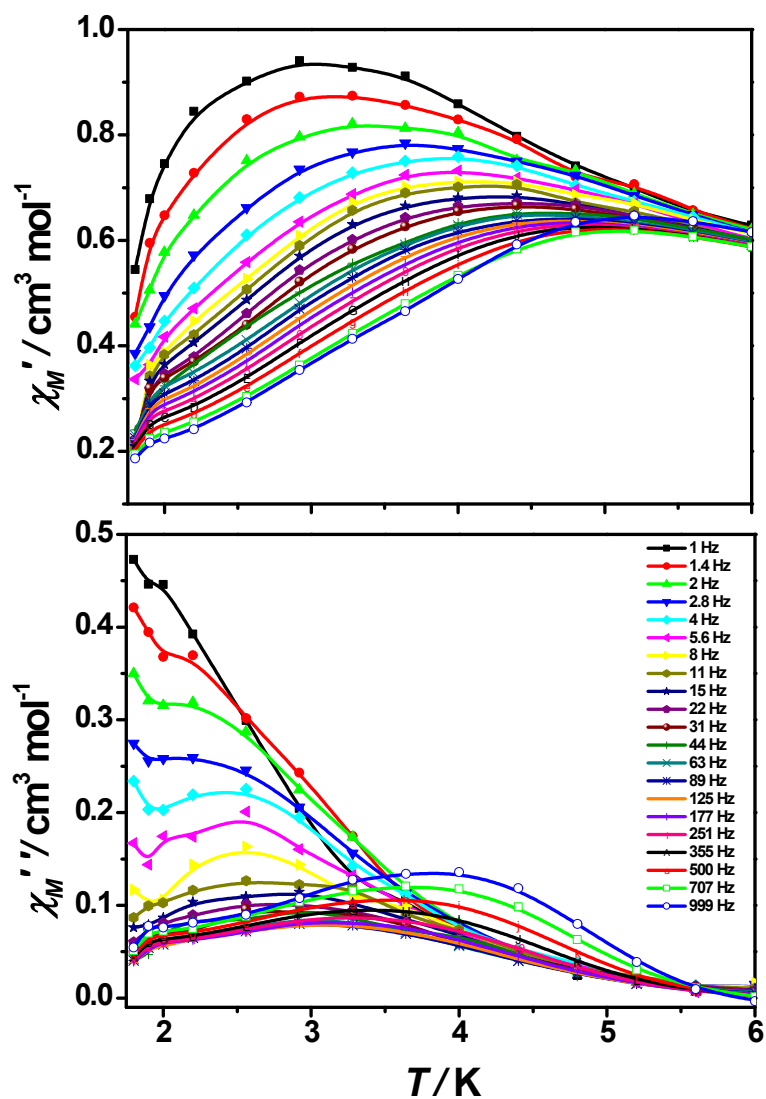

**Fig. S18** Temperature dependence of in-of-phase ( $\chi_M'$ ) and out-of-phase ac susceptibility ( $\chi_M''$ ) at different ac frequency under a 0.6 T dc field for **1**. The solid lines are for eye guide.

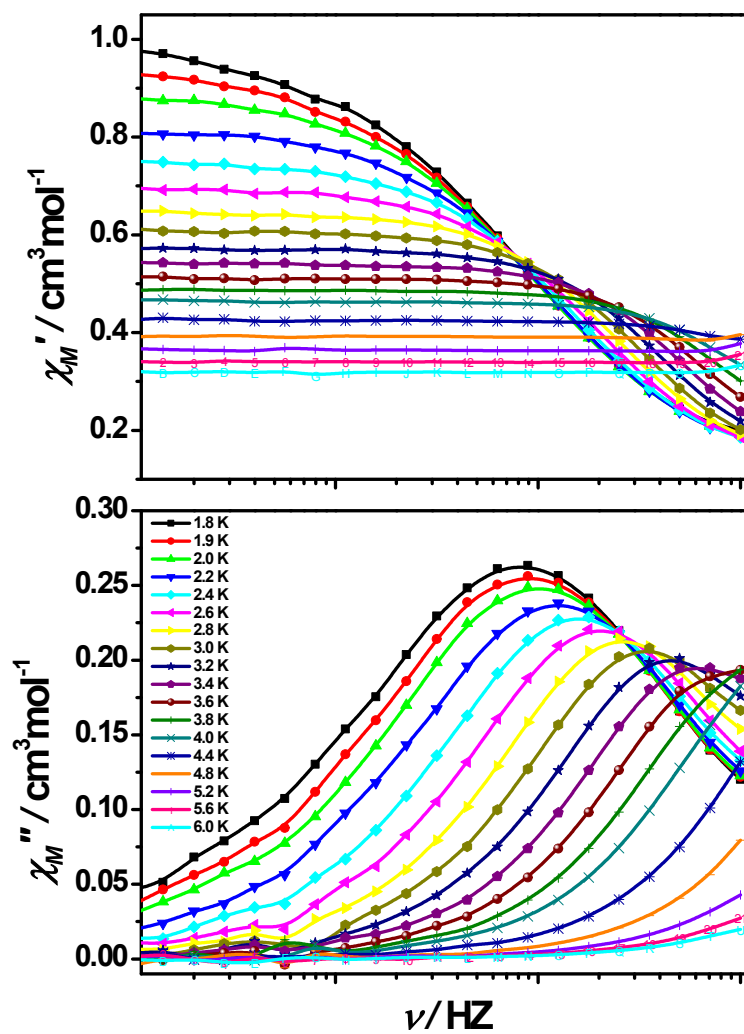

**Fig. S19** Frequency dependence of the ac susceptibility from 1.8 to 6 K for **2** under 0.08

T. The solid lines are for eye guide.

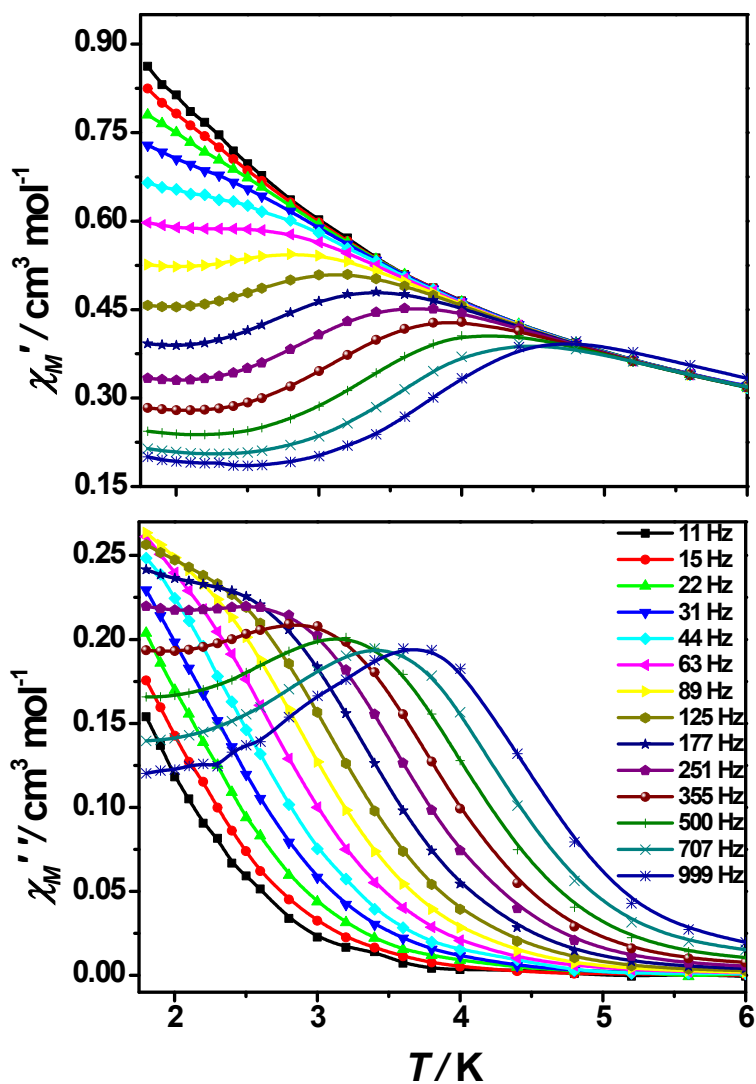

**Fig. S20** Temperature dependence of in-of-phase ( $\chi_M'$ ) and out-of-phase ac susceptibility ( $\chi_M''$ ) at different ac frequency under a 0.08 T dc field for **2**. The solid lines are for eye guide.

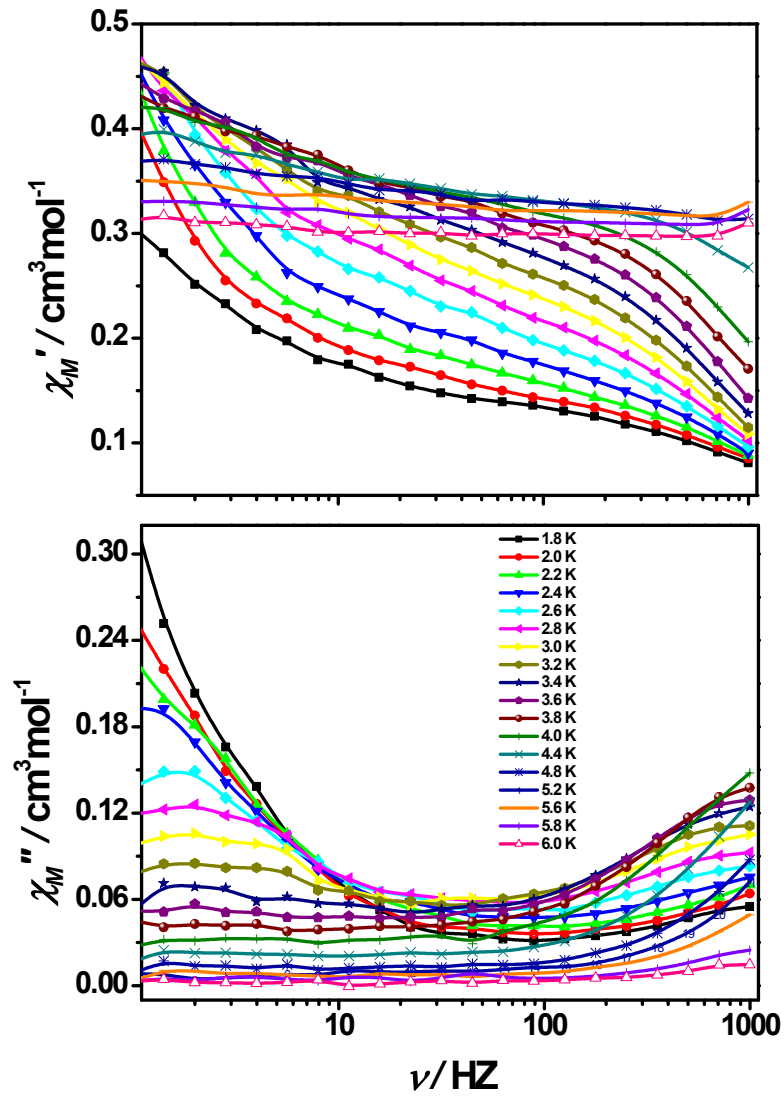

**Fig. 21** Frequency dependence of the ac susceptibility from 1.8 to 6 K for **2** under 0.6

T. The solid lines are for eye guide.

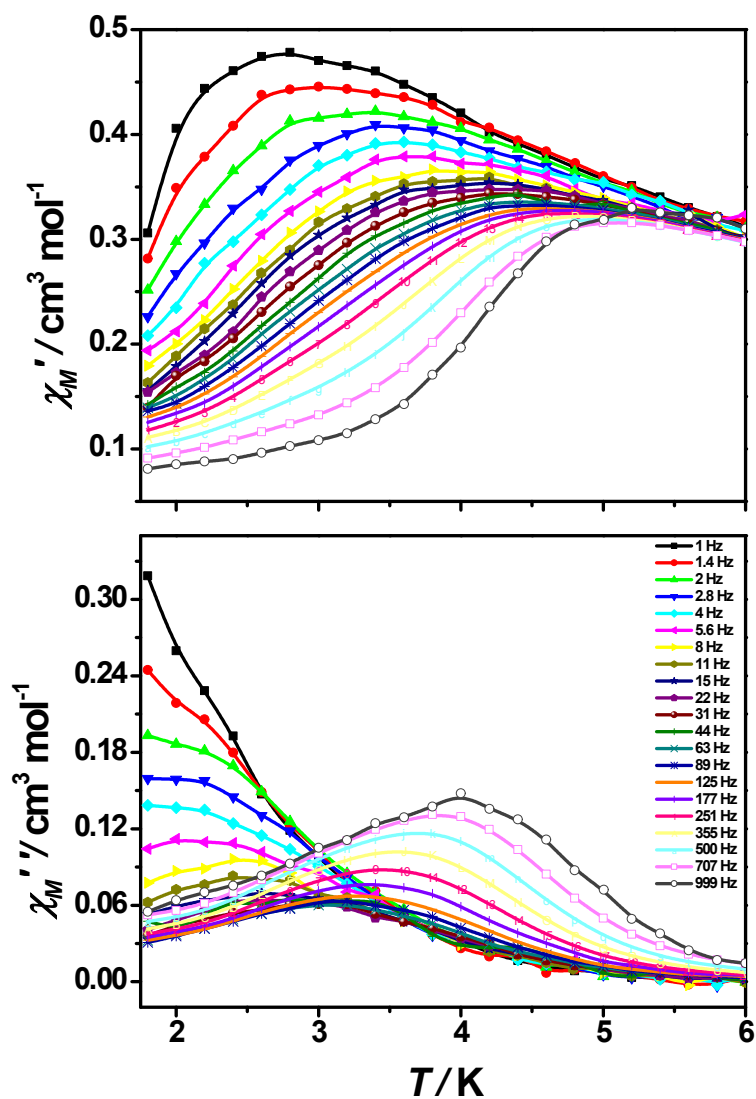

**Fig. S22** Temperature dependence of in-of-phase ( $\chi_M'$ ) and out-of-phase ac susceptibility ( $\chi_M''$ ) at different ac frequency under a 0.6 T dc field for **2**. The solid lines are for eye guide.

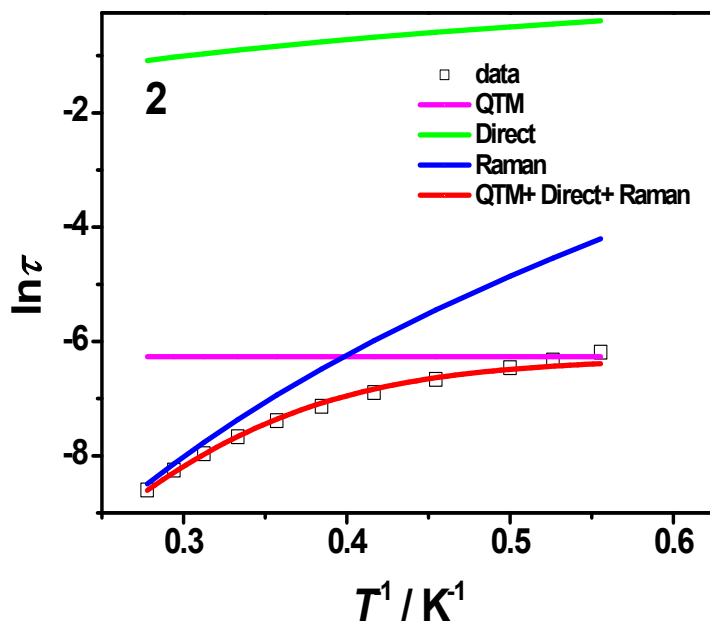

Fig. S23 Relaxation time of the magnetization  $\ln(\tau)$  vs  $T^{-1}$  plots for 2 at 0.08 T.

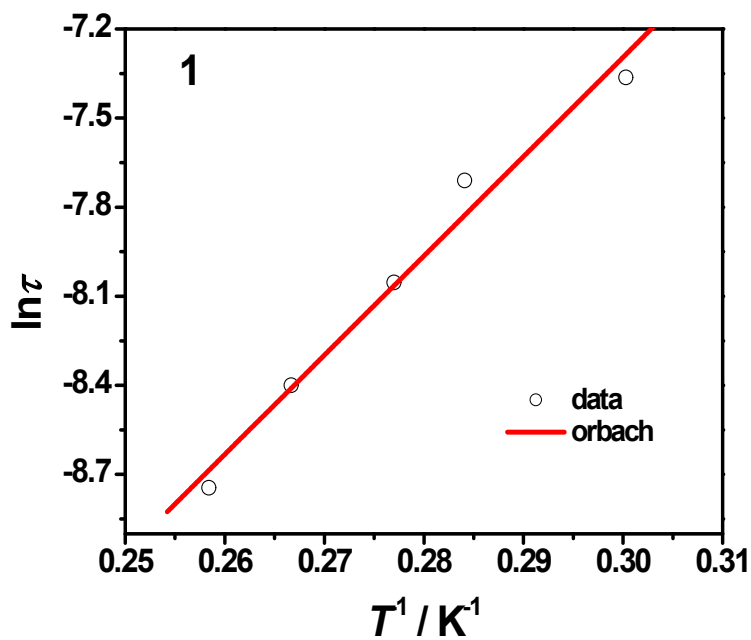

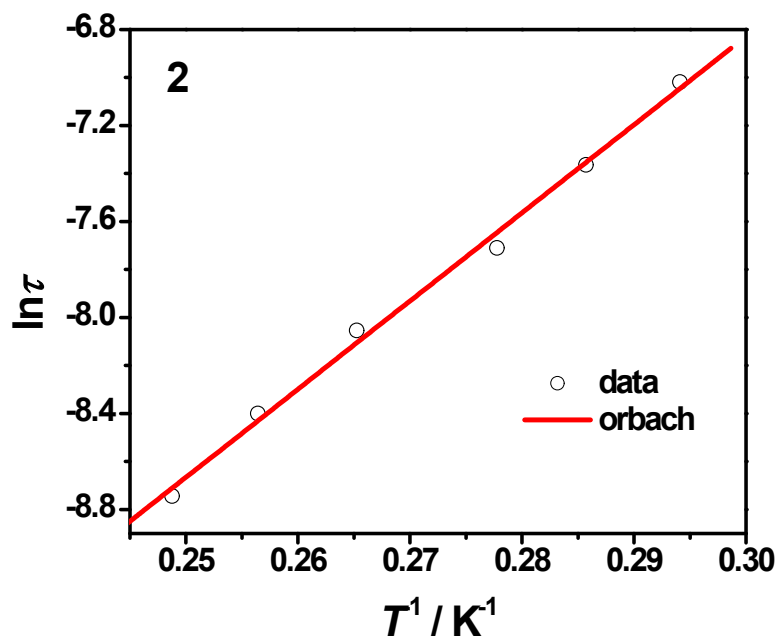

**Fig. S24** Relaxation time of the magnetization  $\ln(\tau)$  vs  $T^{-1}$  plots for **1-2** at 0.6 T fitted with Arrhenius' law  $\tau = \tau^0 \exp(U_{eff}/k_B T)$ .

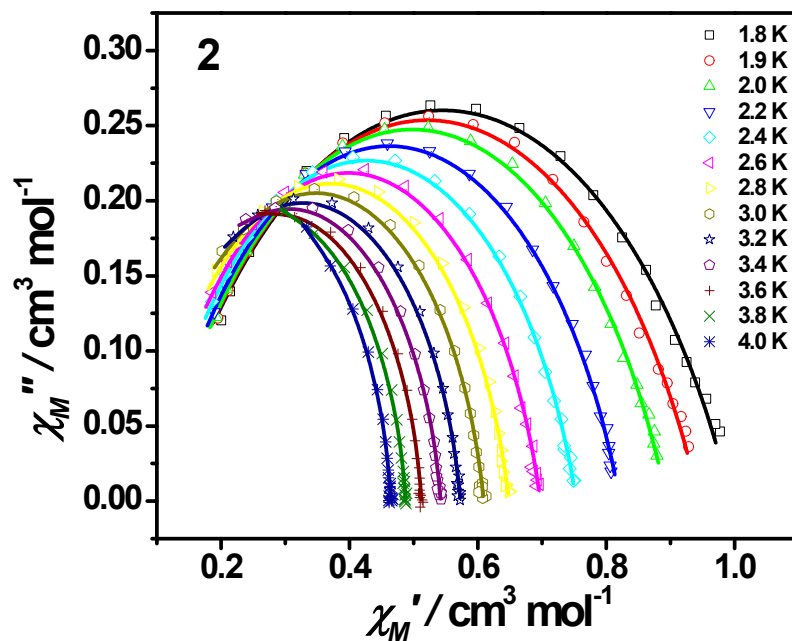

**Fig. S25** Cole-Cole plot obtained from the ac susceptibility data under different range of temperature for **2**. Solid lines represent the best fits to a generalized Debye model<sup>S6</sup>.

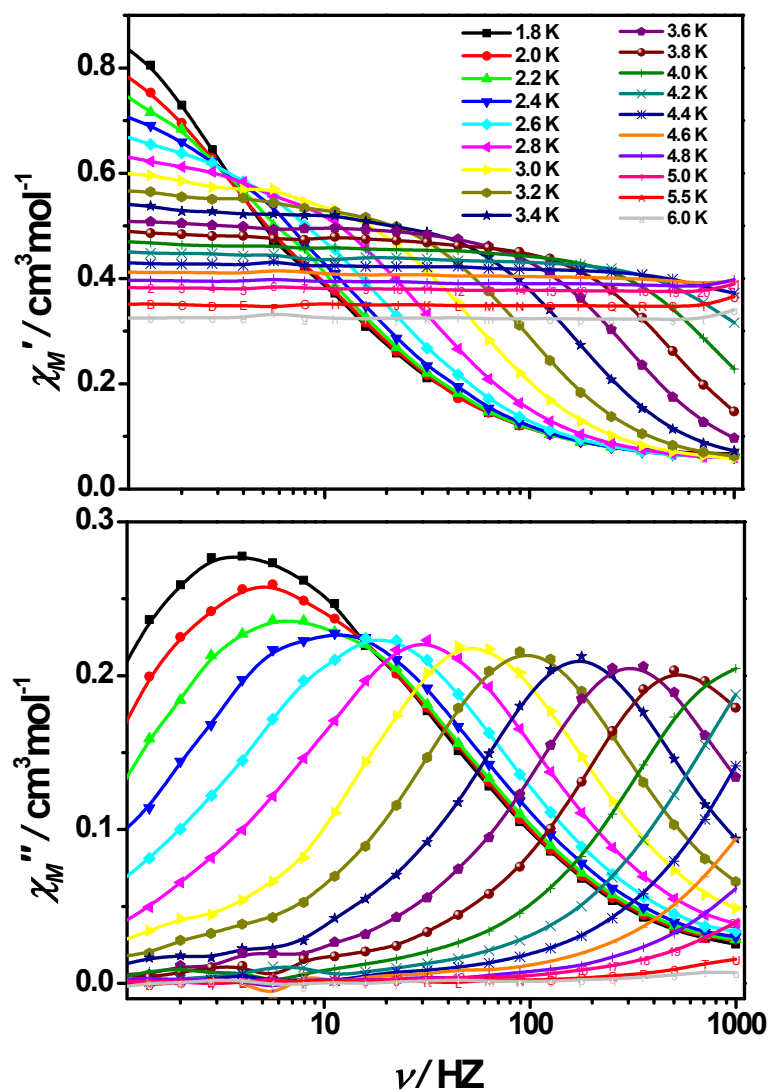

**Fig. S26** Frequency dependence of the ac susceptibility from 1.8 to 6 K for **3** under 0.2

T. The solid lines are for eye guide.



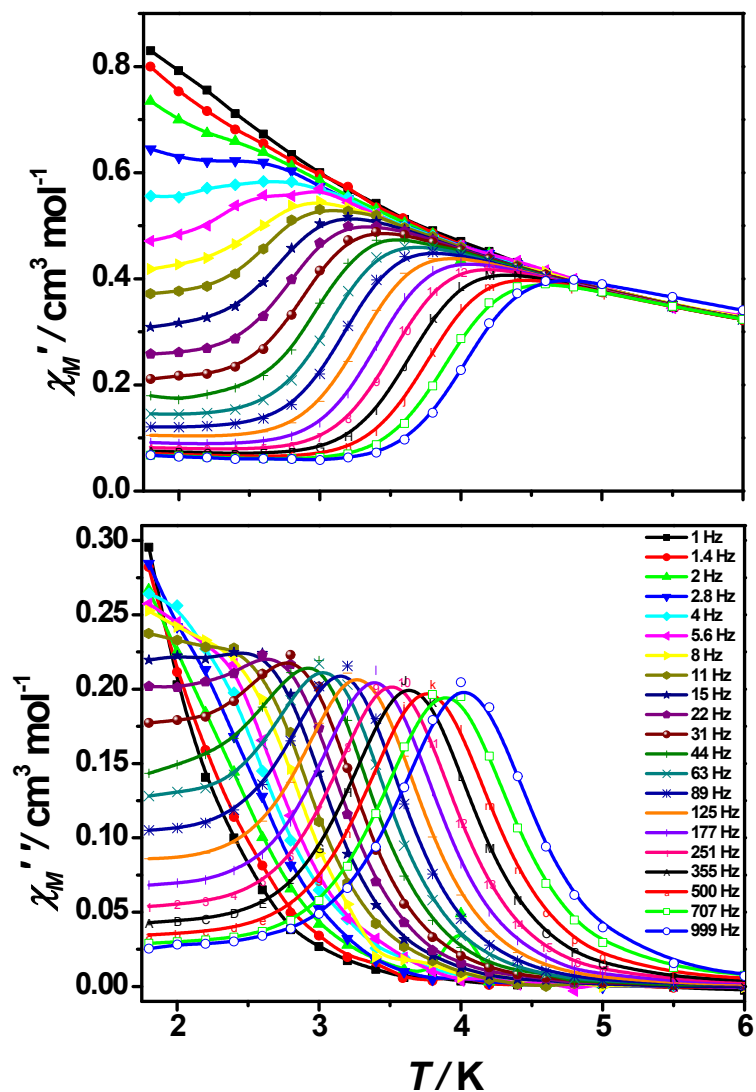

**Fig. S27** Temperature dependence of in-of-phase ( $\chi_M'$ ) and out-of-phase ac susceptibility ( $\chi_M''$ ) at different ac frequency under a 0.2 T dc field for **3**. The solid lines are for eye guide.

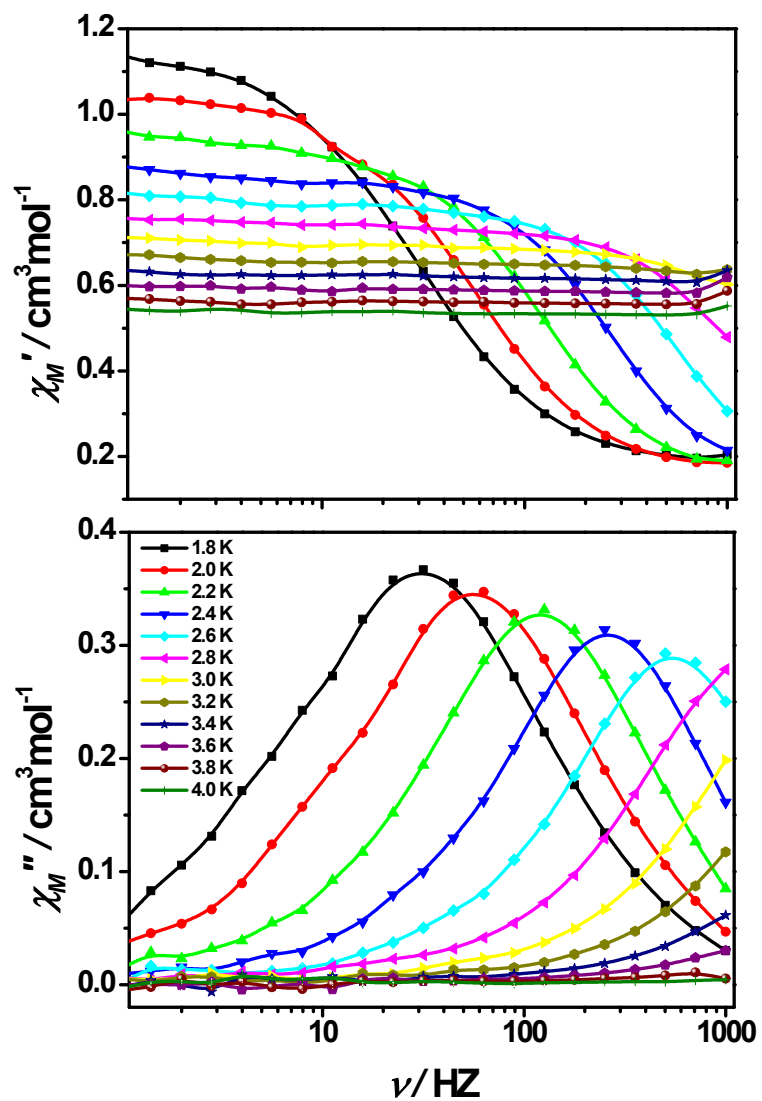

**Fig. S28** Frequency dependence of the ac susceptibility from 1.8 to 4 K for 4 under 0.1

T. The solid lines are for eye guide.

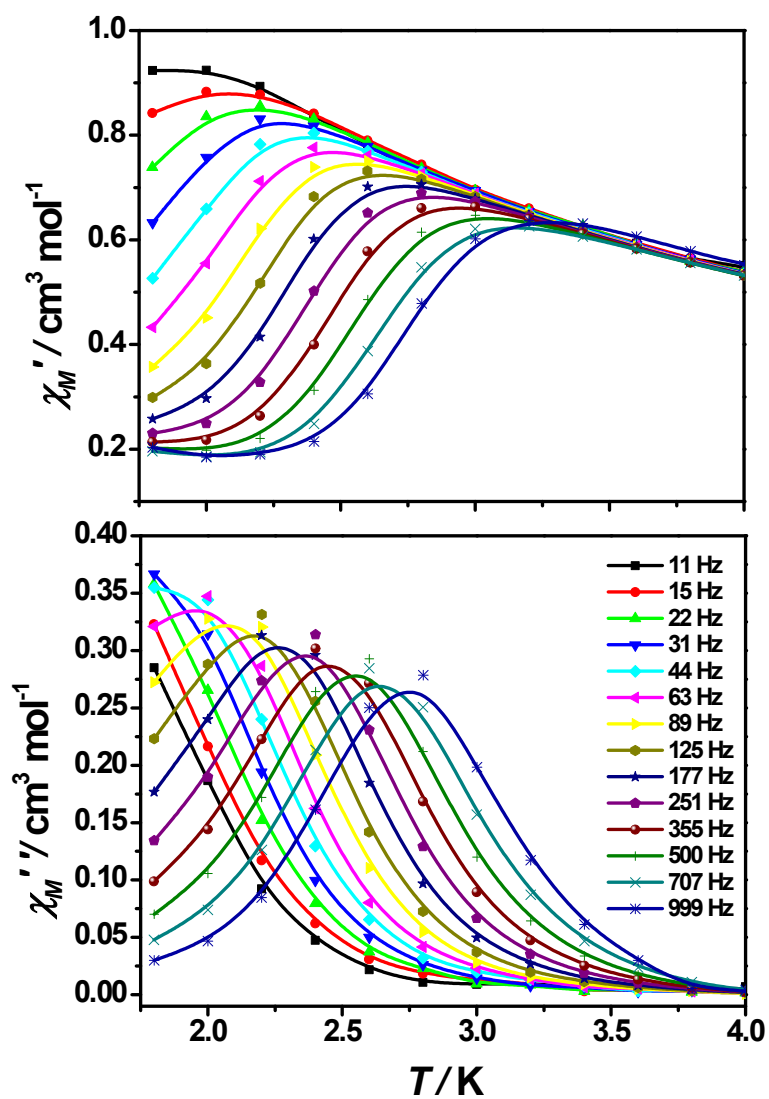

**Fig. S29** Temperature dependence of in-of-phase ( $\chi_M'$ ) and out-of-phase ac susceptibility ( $\chi_M''$ ) at different ac frequency under a 0.1 T dc field for **4**. The solid lines are for eye guide.

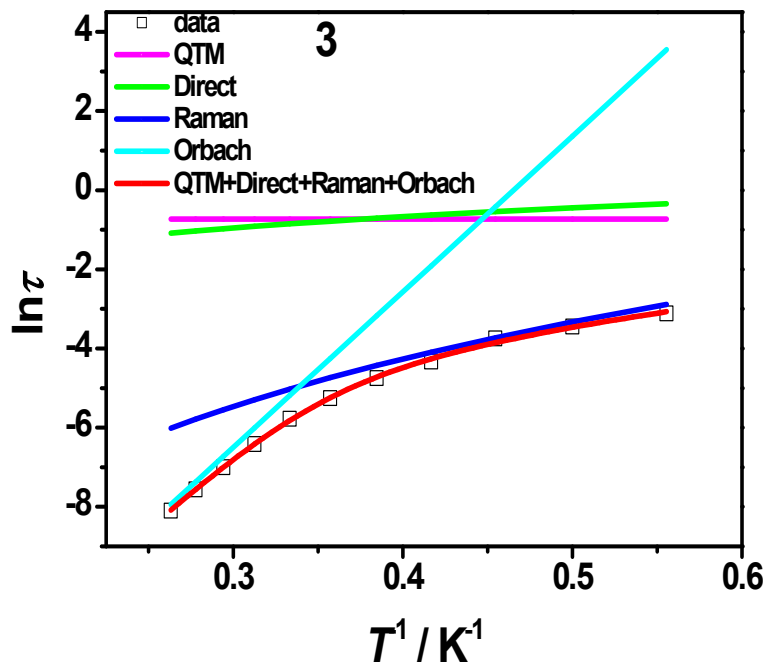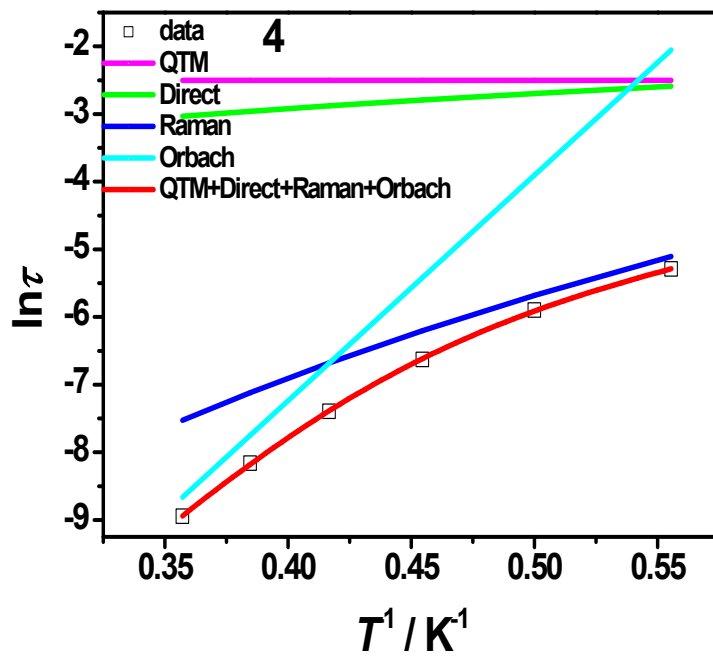

**Fig. S30** Relaxation time of the magnetization  $\ln(\tau)$  vs  $T^{-1}$  plots for **3** and **4**.

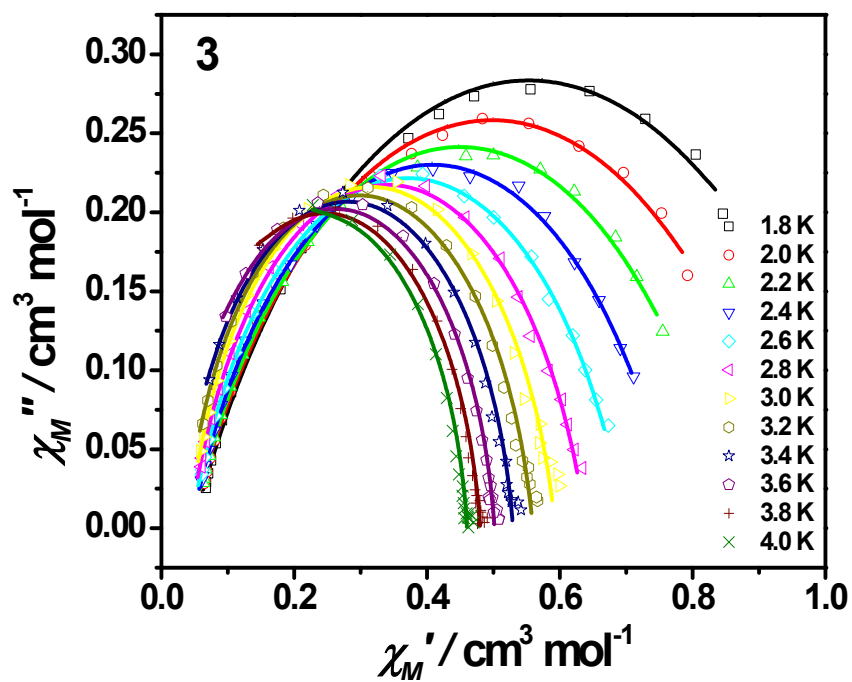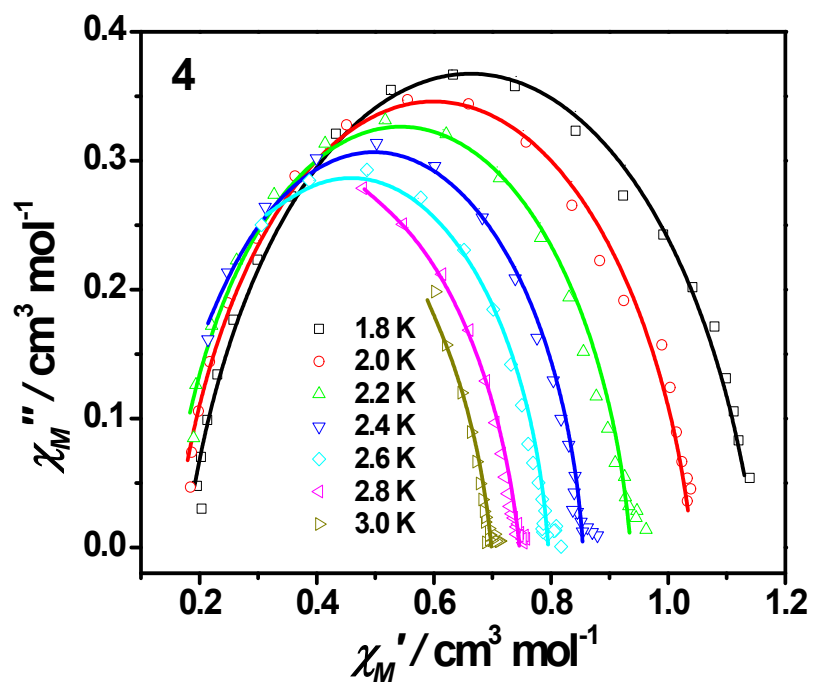

**Fig. S31** Cole-Cole plot obtained from the ac susceptibility data under different range of temperature for **3** and **4**. Solid lines represent the best fits to a generalized Debye model<sup>S6</sup>.

**Table S8** Relaxation times  $\tau$  (s) and  $\alpha$  values for **1-4**.

| <b>1</b> |          |          |            |          |
|----------|----------|----------|------------|----------|
| T (K)    | $\chi_s$ | $\chi_T$ | $\tau$ (s) | $\alpha$ |
| 1.8      | 0.14     | 2.07     | 0.37E-02   | 0.41     |
| 1.9      | 0.15     | 1.94     | 0.29E-02   | 0.38     |
| 2.0      | 0.16     | 1.82     | 0.24E-02   | 0.36     |
| 2.2      | 0.16     | 1.66     | 0.17E-02   | 0.34     |
| 2.6      | 0.17     | 1.43     | 0.10E-02   | 0.28     |
| 2.9      | 0.19     | 1.26     | 0.66E-03   | 0.23     |
| 3.3      | 0.20     | 1.13     | 0.44E-03   | 0.18     |
| 3.6      | 0.20     | 1.03     | 0.28E-03   | 0.14     |
| 4.0      | 0.20     | 0.94     | 0.17E-03   | 0.10     |
| 4.4      | 0.17E-05 | 0.86     | 0.57E-04   | 0.10     |
| <b>2</b> |          |          |            |          |
| T (K)    | $\chi_s$ | $\chi_T$ | $\tau$ (s) | $\alpha$ |
| 1.8      | 0.10     | 0.10     | 0.20E-02   | 0.33     |
| 1.9      | 0.10     | 0.94     | 0.18E-02   | 0.31     |
| 2.0      | 0.10     | 0.89     | 0.16E-02   | 0.29     |
| 2.2      | 0.10     | 0.82     | 0.13E-02   | 0.26     |
| 2.4      | 0.10     | 0.75     | 0.98E-03   | 0.22     |
| 2.6      | 0.10     | 0.70     | 0.76E-03   | 0.19     |
| 2.8      | 0.09     | 0.65     | 0.58E-03   | 0.16     |
| 3.0      | 0.09     | 0.61     | 0.44E-03   | 0.14     |
| 3.2      | 0.08     | 0.57     | 0.34E-03   | 0.13     |
| 3.4      | 0.07     | 0.54     | 0.25E-03   | 0.11     |
| 3.6      | 0.06     | 0.51     | 0.19E-03   | 0.09     |
| 3.8      | 0.03     | 0.49     | 0.13E-03   | 0.09     |
| 4.0      | 0.03     | 0.46     | 0.93E-04   | 0.08     |

| <b>3</b> |          |          |            |          |
|----------|----------|----------|------------|----------|
| T (K)    | $\chi_s$ | $\chi_T$ | $\tau$ (s) | $\alpha$ |
| 1.8      | 0.05     | 1.06     | 0.36E-01   | 0.35     |
| 2.0      | 0.04     | 0.95     | 0.28E-01   | 0.34     |
| 2.2      | 0.04     | 0.86     | 0.20E-01   | 0.31     |
| 2.4      | 0.04     | 0.77     | 0.14E-01   | 0.28     |
| 2.6      | 0.04     | 0.70     | 0.90E-02   | 0.24     |
| 2.8      | 0.04     | 0.64     | 0.53E-02   | 0.19     |
| 3.0      | 0.04     | 0.59     | 0.30E-02   | 0.15     |
| 3.2      | 0.04     | 0.56     | 0.17E-02   | 0.13     |
| 3.4      | 0.03     | 0.53     | 0.93E-03   | 0.11     |
| 3.6      | 0.03     | 0.50     | 0.51E-03   | 0.09     |
| 3.8      | 0.01     | 0.48     | 0.29E-03   | 0.09     |
| 4.0      | 0.24E-11 | 0.46     | 0.16E-03   | 0.08     |
| <b>4</b> |          |          |            |          |
| T (K)    | $\chi_s$ | $\chi_T$ | $\tau$ (s) | $\alpha$ |
| 1.8      | 0.18     | 1.15     | 0.55E-02   | 0.17     |
| 2.0      | 0.16     | 1.04     | 0.30E-02   | 0.15     |
| 2.2      | 0.15     | 0.94     | 0.14E-02   | 0.11     |
| 2.4      | 0.14     | 0.85     | 0.63E-03   | 0.09     |
| 2.6      | 0.12     | 0.79     | 0.29E-03   | 0.09     |
| 2.8      | 0.01     | 0.75     | 0.11E-03   | 0.14     |
| 3.0      | 0.95E-15 | 0.70     | 0.49E-04   | 0.13     |

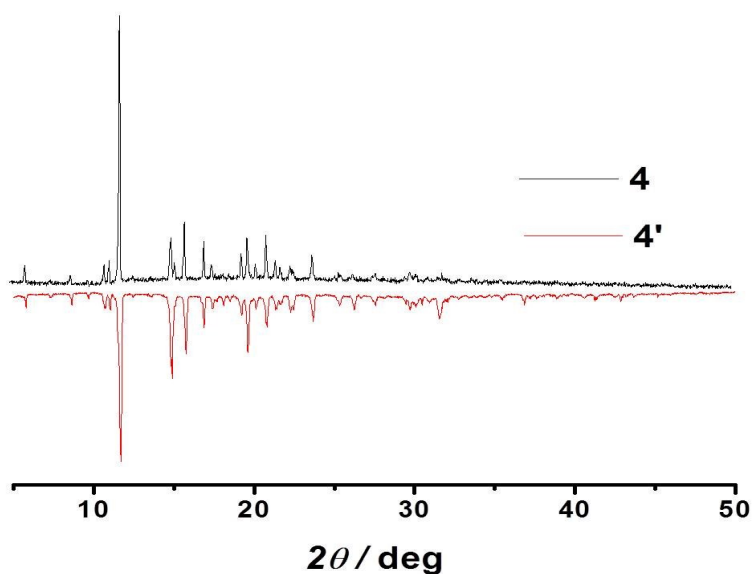

**Fig. S32** XRD patterns for complex **4** and the diluted complex **4'**.

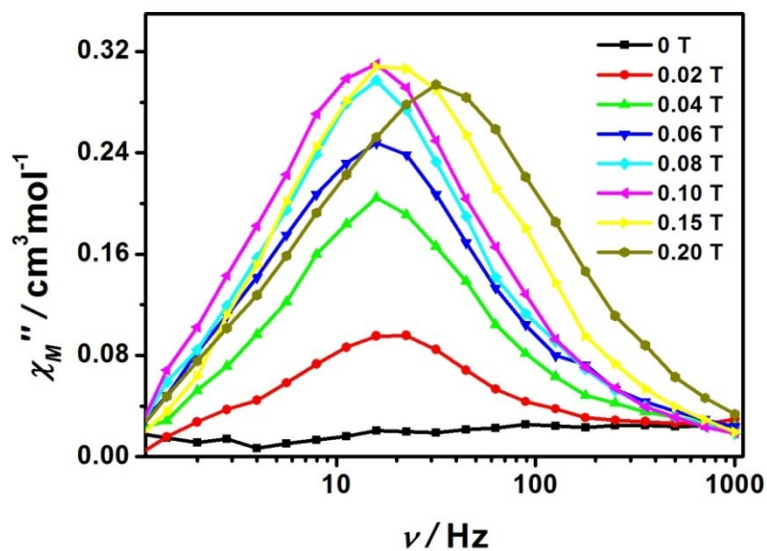

**Fig. S33** Frequency dependence of out-of-phase ( $\chi_M''$ ) ac susceptibility at 1.8 K under the different applied static fields for **4'**. The solid lines are for eye guide.



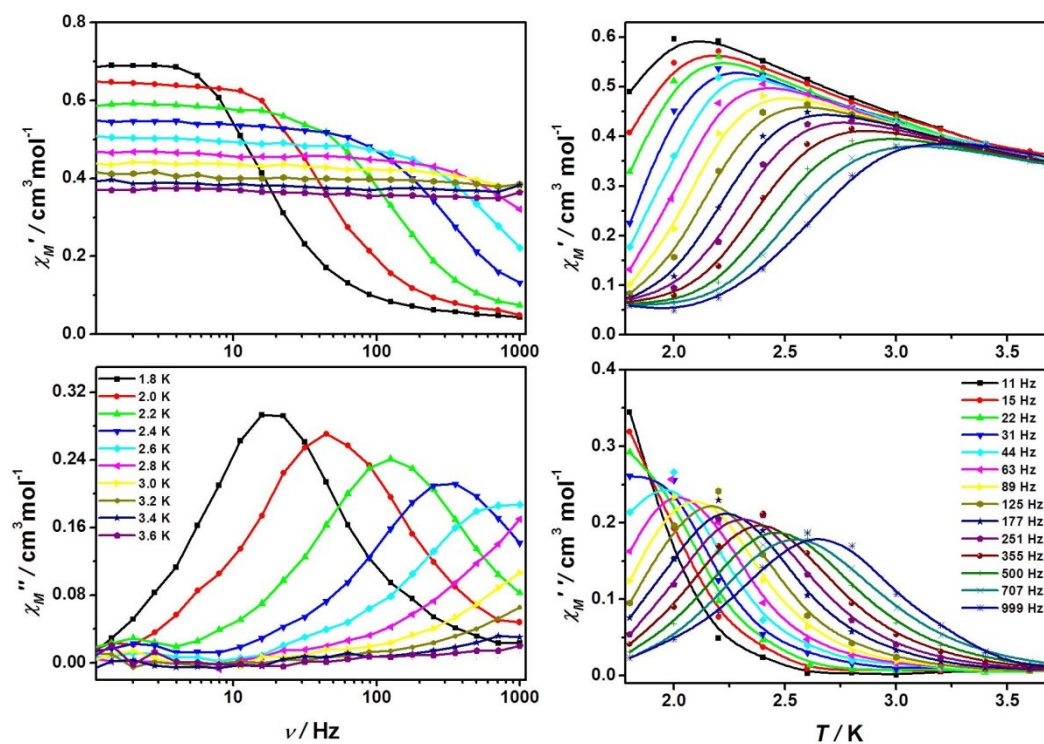

**Fig. S34** Frequency and temperature dependence of the in-of-phase ( $\chi_M'$ ) and out-of-phase ( $\chi_M''$ ) ac susceptibility under 0.10 T dc field for **4'**. The solid lines are for eye guide.

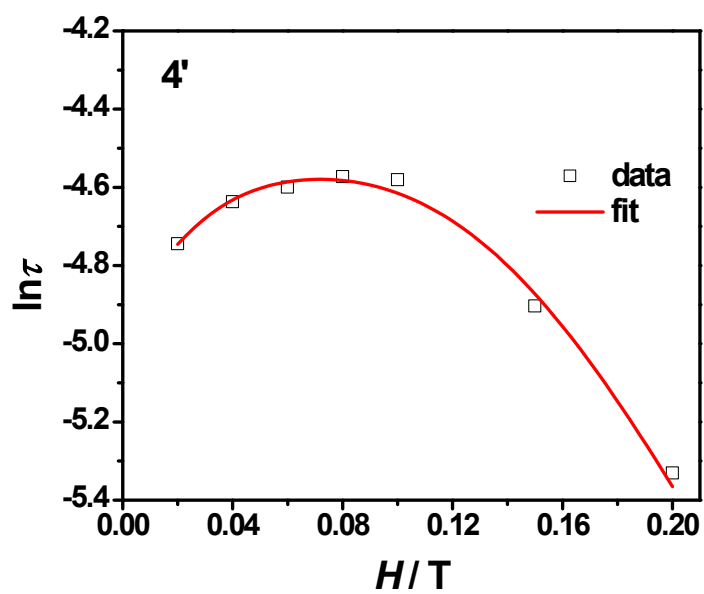

**Fig. S35** Field dependence of the magnetization relaxation times for **4'**. The red line represents the best fit by using eqn (3).

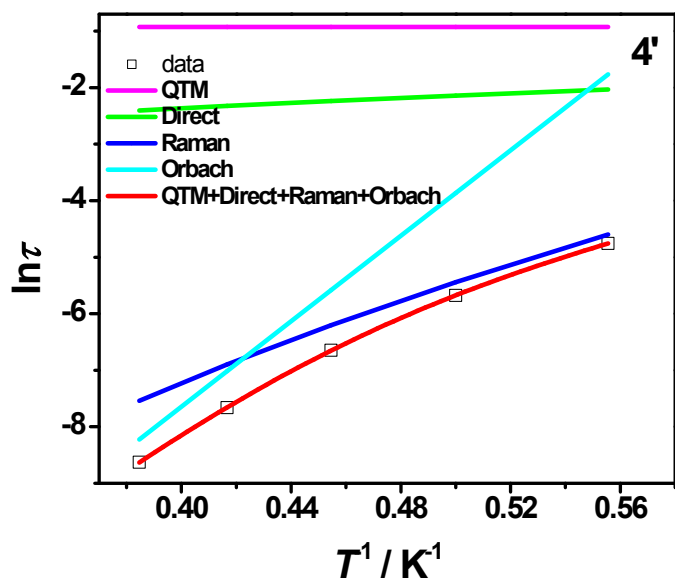

**Fig. S36** Relaxation time of the magnetization  $\ln(\tau)$  vs  $T^{-1}$  plots for  $4'$ .

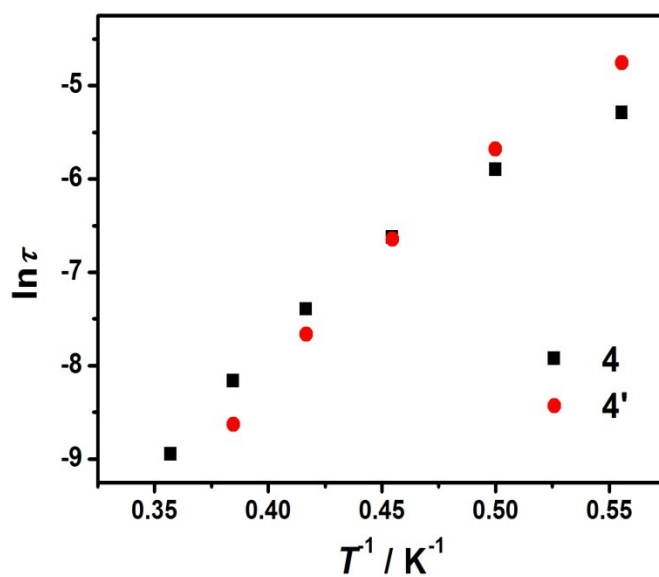

**Fig. S37** Relaxation time of the magnetization  $\ln(\tau)$  vs  $T^{-1}$  plot for  $4$  and  $4'$  under the same dc field of 0.10 T.

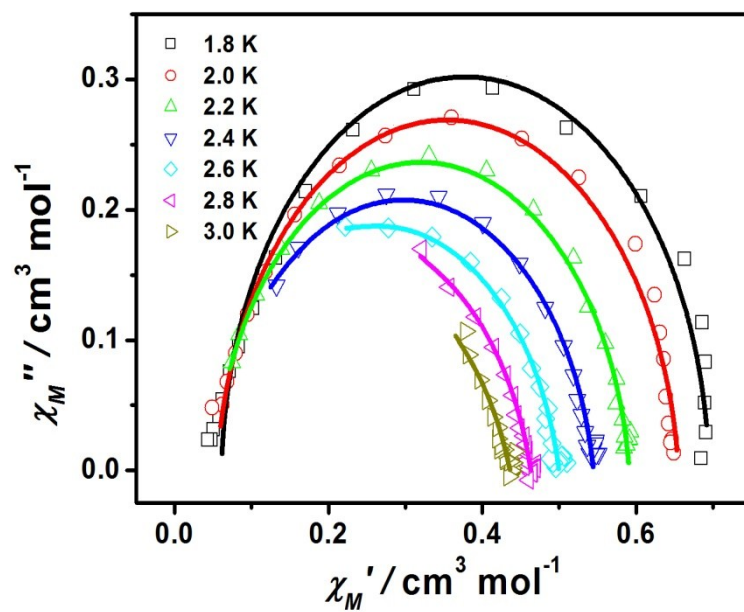

**Fig. S38** Cole-Cole plot obtained from the ac susceptibility data under different temperature for **4'**. Solid lines represent the best fits to a generalized Debye model.

**Table S9** Relaxation times  $\tau$  (s) and  $\alpha$  values for **4'**.

| <b>4'</b> |                        |          |                       |          |
|-----------|------------------------|----------|-----------------------|----------|
| T (K)     | $\chi_S$               | $\chi_T$ | $\tau$ (s)            | $\alpha$ |
| 1.8       | 0.06                   | 0.69     | $0.83 \times 10^{-2}$ | 0.02     |
| 2.0       | 0.05                   | 0.65     | $0.33 \times 10^{-2}$ | 0.06     |
| 2.2       | 0.05                   | 0.59     | $0.12 \times 10^{-2}$ | 0.07     |
| 2.4       | 0.05                   | 0.54     | $0.49 \times 10^{-3}$ | 0.10     |
| 2.6       | 0.03                   | 0.50     | $0.20 \times 10^{-3}$ | 0.13     |
| 2.8       | $0.24 \times 10^{-14}$ | 0.46     | $0.88 \times 10^{-4}$ | 0.15     |
| 3.0       | $0.41 \times 10^{-14}$ | 0.44     | $0.39 \times 10^{-4}$ | 0.20     |

## References

- S1** (a) M. Llunell, D. Casanova, J. Cirera, P. Alemany and S. Alvarez, *Shape Program*, Version 2.1, 2013; (b) S. Alvarez, P. Alemany, D. Casanova, J. Cirera, M. Llunell and D. Avnir, *Coord. Chem. Rev.*, 2005, **249**, 1693-1708.
- S2** N. F. Chilton, R. P. Anderson, L. D. Turner, A. Soncini and K. S. Murray, *J. Comput. Chem.*, 2013, **34**, 1164.
- S3** Simulations were performed using SPIN developed by Andrew Ozarowski at the National High Magnetic Field Laboratory, USA.
- S4** (a) F. Aquilante, L. De Vico, N. Ferré, G. Ghigo, P.-Å. Malmqvist, P. Neogrády, T. B. Pedersen, M. Pitonak, M. Reiher, B. O. Roos, L. Serrano-Andrés, M. Urban, V. Veryazov and R. Lindh, *J. Comput. Chem.*, 2010, **31**, 224; (b) V. Veryazov, P.-O. Widmark, L. Serrano-Andres, R. Lindh and B. O. Roos, *Int. J. Quantum Chem.*, 2004, **100**, 626; (c) G. Karlström, R. Lindh, P.-

Å. Malmqvist, B. O. Roos, U. Ryde, V. Veryazov, P.-O. Widmark, M. Cossi,  
B. Schimmelpfennig, P. Neogrady and L. Seijo, *Comput. Mater. Sci.*, 2003, **28**,  
222.

**S5** (a) L. F. Chibotaru, L. Ungur and A. Soncini, *Angew. Chem. Int. Ed.*, 2008, **47**,  
4126; (b) L. Ungur, W. Van den Heuvel and L. F. Chibotaru, *New J. Chem.*,  
2009, **33**, 1224; (c) L. F. Chibotaru, L. Ungur, C. Aronica, H. Elmoll, G. Pilet  
and D. Luneau, *J. Am. Chem. Soc.*, 2008, **130**, 12445.

**S6** (a) K. S. Cole and R. H. Cole, *J. Chem. Phys.*, 1941, **9**, 341; (b) Y.-N. Guo,  
G.-F. Xu, Y. Guo and J. Tang, *Dalton Trans.*, 2011, **40**, 9953-9963.
